1 3 December, 2018

2

3 **Bingeing in rats: Persistence of high intakes of palatable solutions induced by 1-in-4**  
4 **days intermittent access.**

5

6 Simone Rehn and Robert A. Boakes

7 School of Psychology,

8 The University of Sydney

9

10

11

12

13

14

15 Correspondence:

16 Professor R. A. Boakes,

17 School of Psychology,

18 University of Sydney, NSW 2006, Australia

19 Email: [bob.boakes@sydney.edu.au](mailto:bob.boakes@sydney.edu.au) Tel: (612) 9351 3347

20

21

22  
23  
24  
25  
26  
27  
28  
29  
30  
31  
32  
33  
34  
35  
36  
37  
38  
39  
40  
41  
42  
43  
44

## Abstract

When animals are given access to a palatable food or drink on some days but not on others, the amount they consume can far exceed the daily amounts consumed by controls given daily access. In a previous study such bingeing was found when rats were given 4% sucrose solution; it also found that, following 1-in-4-days access for many weeks, intakes remained persistently higher than that of controls even when the conditions were changed to 1-in-2-days access for both groups. One aim of the three experiments reported here was to test whether such persistent bingeing could be found for other solutions. This was confirmed in rats for a saccharin solution and a highly palatable saccharin-plus-glucose solution. However, when a maltodextrin solution was used, initial increased intakes produced by the 1-in-4-days schedule were not maintained when this was changed to a 1-in-2-days schedule. These results suggested that the hedonic value of a solution is more important than its caloric content in determining whether it will support persistent bingeing. A second aim was to test for evidence that the 1-in-4-days procedure induced an addiction to the target solution. No such evidence was found using multiple measures including instrumental responding and anxiety-like behavior on the elevated plus-maze for craving and withdrawal respectively.

208 words

Keywords: Bingeing; sucrose; saccharin; maltodextrin; rats.

## 1. Introduction

45  
46 Binge eating can be defined as the consumption of a large amount of food in a short period  
47 of time (APA, 2013). In humans it can lead to detrimental consequences to individuals'  
48 physical and psychological well-being. For example, binge eating is associated with a loss of  
49 control, intense guilt, and excessive weight gain over the long-term, especially when binges  
50 occur without compensation at other times for an increased caloric intake (i.e. binge-eating  
51 disorder) (APA, 2013). The types of food consumed in binges tend to be those high in sugar  
52 and fat (Yanovski et al., 1992), the overconsumption of which have been linked to obesity  
53 and cognitive impairments in human studies (Francis & Stevenson, 2011; Kanoski &  
54 Davidson, 2011; Nyaradi et al., 2014).

55 Although many binge-eating individuals acknowledge the associated health problems  
56 (Colles, Dixon, & O'Brien, 2008) and experience distress over their binge eating (APA,  
57 2013), they continue engaging in compulsive eating behaviors. This loss of control  
58 highlights the difficulty of treatment upon the onset of problematic binge eating and  
59 emphasizes the need to understand factors underlying binge-eating development. Several  
60 animal models have consequently been established to explore the development of binge-like  
61 consumption of high-sugar and/or high-fat food and drinks. Some of these models provide  
62 access to highly palatable foods or drinks for a limited period each day (e.g. Avena, Rada, &  
63 Hoebel, 2008). Arguably, these fail to model typical human bingeing behavior and are  
64 subject to confounding by circadian entrainment (e.g. Eikelboom & Hewitt, 2016). Others  
65 provide such access on only certain days (e.g. Corwin & Wojnicki, 2006), a pattern that  
66 resembles human bingeing (Kales, 1990).

67 A common finding in such animal studies is that intakes during periods of intermittent  
68 access are far greater than the average intakes during similar periods by animals with  
69 unrestricted access to the same highly palatable foods or drinks (e.g. Avena, Rada, et al.,  
70 2008; Corwin & Wojnicki, 2006). Such a result was also reported by Eikelboom and Hewitt  
71 (2016). In their series of experiments intermittent access to a sucrose solution produced long-  
72 term increases in consumption that resembled bingeing. What was remarkable about their  
73 study was that under some conditions these elevated intakes persisted even when the  
74 conditions that produced them were terminated. In their first experiment, rats were given  
75 either continuous, second-, third-, or fourth-day 23.5-h access to a 4% sucrose solution for 49  
76 days (Phase 1) before all were switched to alternate-day access for an additional 24 days  
77 (Phase 2). The most striking results were obtained from the intermittent group given sucrose  
78 solution every fourth day; these rats came to consume up to three times the amount of sucrose

79 solution (~300 g) in 23.5 h relative to rats with continuous access (~100 g) in Phase 1.  
80 Critically, when shifted to identical alternate-day access conditions in Phase 2, the fourth-  
81 day-access group maintained much higher sucrose intakes relative to the continuous group for  
82 the remainder of the experiment. Since the largest intake difference was found between these  
83 two groups, they will hereafter be referred to here as the Binge and Unrestricted groups of the  
84 Eikelboom protocol.

85 When compared with previous binge models (e.g. Avena, Rada, et al., 2008; Corwin &  
86 Wojnicki, 2006), Eikelboom and Hewitt (2016) appears to be the only study to demonstrate  
87 *persistence* of elevated intakes induced by intermittent-access conditions. Additionally, this  
88 protocol specifies that the deprivation condition of the binge (fourth-day access; Binge) and  
89 non-binge (continuous access; Unrestricted) animals is identical with regards to sucrose  
90 access during Phase 2, yet the binge animals repeatedly consume much larger amounts in the  
91 same period of time, thus satisfying the operationalization of a binge (Corwin & Buda-Levin,  
92 2004). This intake difference also mimics the criterion of ‘objectively larger amounts’  
93 consumed in human binge episodes (APA, 2013). Finally, rats were fed *ad libitum* in this  
94 protocol, which allows a distinction between binge-like and homeostatic consumption.

95 The Eikelboom protocol also eliminates circadian entrainment effects by providing 24-h  
96 access to a sucrose solution on the day that it is available. This extended access is vital for  
97 producing the absolute increases in daily sucrose intake seen in the binge group. Procedures  
98 that maintain circadian regularity usually fail to produce differences in total daily intake  
99 between binge and non-binge groups (Avena, Rada, et al., 2008). In the case of fat bingeing  
100 rats given access schedules that maintain circadian regularity (i.e. 2-h daily fat access) exhibit  
101 much smaller elevations in intake compared to rats that do not (i.e. 2-h fat access on three  
102 days a week). Furthermore, the elimination of circadian entrainment effects is essential to  
103 avoid artefactual patterns of behavior. The alignment of circadian rhythm with periodic time  
104 cues, such as light/dark cycles or expected feeding times, produces daily rhythms of food-  
105 anticipatory activity before expected meal times (Mistlberger, 1993). This activity can  
106 manifest as increased wheel running (Bolles & Stokes, 1965) and lever pressing (Boulos,  
107 Rosenwasser, & Terman, 1980). However, food-anticipatory activity does not occur in rats  
108 fed *ad libitum* (Landry, Yamakawa, Webb, Mear, & Mistlberger, 2007) nor with day-long  
109 sucrose access that does not align with circadian rhythm.

110 By avoiding circadian-entrained food-anticipatory behavior, this protocol also enables a  
111 clearer examination of the overlap between bingeing and addiction (see Corwin & Babbs,  
112 2012 for review). Hoebel’s influential model of ‘sugar addiction’ has proposed that

113 intermittent, excessive intake of sugar produces ‘withdrawal’ (Colantuoni et al., 2002) and  
114 ‘craving’ (Avena, Long, & Hoebel, 2005). However, this model pits food-entrained rhythms  
115 against light-entrained rhythms; rats are food-deprived daily for 12 h and then given 12-h  
116 access to sugar (25% glucose or 10% sucrose) and chow 4 h into the dark cycle of their  
117 circadian rhythm (Avena, Rada, et al., 2008). Under these competing conditions, access to  
118 sugar can engage food-entrained rhythms and result in elevated activity during expected  
119 sugar-access times (Bolles & Stokes, 1965; Pecoraro, Gomez, Laugero, & Dallman, 2002). It  
120 has been argued that findings of increased lever-pressing in sugar-bingeing rats relative to  
121 controls after abstinence is an indication of ‘craving’ (Avena et al., 2005; Avena, Rada, et al.,  
122 2008). It is unclear, however, whether the control group in this study were under similar food  
123 deprivation conditions as the sugar-bingeing rats. Given that food-anticipatory activity would  
124 not occur in controls fed *ad libitum* (Landry et al., 2007), increased lever-pressing in the  
125 sugar-bingeing rats may instead be attributed to food-anticipatory behavior. Similarly, sugar-  
126 bingeing rats may have exhibited greater anxiety-like behavior on an elevated plus-maze  
127 (EPM) than an *ad libitum* chow group – which has been taken to indicate ‘withdrawal’ –  
128 because they were denied access to chow and sugar during expected feeding times  
129 (Colantuoni et al., 2002). This study included a cyclic glucose control group which would  
130 have also displayed food-anticipatory behavior, but whether the sugar-bingeing group  
131 differed from these controls was not reported (Colantuoni et al., 2002).

132 Given the advantages of the Eikelboom protocol in promoting binge-like sucrose  
133 consumption in rats, the present study had two aims: First, to test whether the persistence of  
134 binge-like consumption of sucrose would generalize to similarly attractive solutions and,  
135 second, to test whether persistent bingeing would be accompanied by addiction-like behavior.  
136 To our knowledge persistent elevation in the consumption of solutions other than 4% sucrose  
137 has not been examined. Maltodextrin is an example of a non-sweet polysaccharide that has  
138 similar metabolic effects to sucrose in rats (Kendig, Lin, Beilharz, Rooney, & Boakes, 2014;  
139 Nissenbaum & Sclafani, 1987). Rats readily consume maltodextrin and are able to  
140 discriminate its taste from sucrose, preferring maltodextrin over sucrose at low concentrations  
141 (Sclafani, 1987). Furthermore, adding saccharin to either sucrose, glucose or maltodextrin  
142 solutions produces a polydipsic effect; rats find such mixed solutions highly palatable and  
143 prefer them to the solutions presented alone (Sclafani, Einberg, & Nissenbaum, 1987).  
144 Therefore, to meet the first aim the current study examined whether persistent binge-like  
145 sucrose consumption under the Eikelboom protocol could be replicated under somewhat  
146 different conditions (Experiment 1) and whether it would generalize to similarly attractive

147 target solutions. In Experiment 2 this was sweet, yet non-caloric, saccharin and caloric, yet  
148 non-sweet, maltodextrin solutions. In Experiment 3 a highly-palatable mixture of saccharin  
149 and glucose was compared to saccharin solution alone.

150 The persistence of elevated intakes in Eikelboom and Hewitt (2016)'s study resemble  
151 tolerance in addiction, which highlight its relevance to exploring the overlap between  
152 bingeing and addiction (see Corwin & Babbs, 2012 for review). Therefore, in addition to  
153 examining whether persistent elevations would generalize to other palatable solutions, the  
154 current study also explored whether addiction-like behavior such as 'withdrawal' and  
155 'craving' would arise as a result of binge-like consumption of these solutions. To this end,  
156 several behavioral measures were employed. These consisted of: 1) lever-press responding  
157 under a variable-ratio (VR) schedule; 2) a flavor preference test; 3) a preference test between  
158 the target solution and an equally attractive solution; and 4) withdrawal-induced anxiety-like  
159 behavior on the elevated plus maze (EPM).

160 The first three tests were measures of 'craving', defined as 'the incentive motivation to  
161 self-administer an abused substance or respond for its associated cues' (Markou et al., 1993).  
162 Variable Ratio (VR) reinforcement schedules have been shown to be sensitive to changes in  
163 self-administration behavior with sucrose reinforcers (Petty & Heyman, 1995). Thus, VR  
164 schedules were used to test whether motivation to respond for a target solution reinforcer  
165 differed between Binge and Unrestricted groups.

166 In the flavor preference test, a novel flavor (i.e. almond) is initially paired with the target  
167 solution (e.g. sucrose) and preference for this flavor over a flavorless solution is taken as a  
168 measure of incentive salience. Flavor preference learning is based on the ability of sucrose  
169 and other highly palatable substances to impart conditioned incentive value onto previously  
170 neutral stimuli, akin to drug-related cues which come to elicit drug-taking behavior (Markou  
171 et al., 1993). Use of this measure was based on a parallel with salt craving: Inducing a  
172 sodium deficiency in rats increases their preference for a flavor previously paired with salt  
173 (Fudim, 1978). This flavor preference test was previously used in a study that found sucrose-  
174 bingeing rats in an adapted Hoebel model to exhibit increased preference for a sucrose-  
175 associated almond flavor (Wu & Boakes, in preparation).

176 An additional preference test between the target solution (e.g. sucrose) and an equally  
177 attractive solution (e.g. maltodextrin) was employed as a further measure of craving. This  
178 measures the unconditioned incentive value, or the reinforcing properties (i.e. hedonic value)  
179 of the target solution itself (Markou et al., 1993). Given that an increase in hedonic set point  
180 has been implicated in addiction (Ahmed & Koob, 1998), this preference test aimed to

181 examine whether Binge groups would show a greater preference for the target solution  
182 relative to an isohedonic solution, reflecting its increased hedonic value, after engaging in  
183 persistent binge-like consumption of the target solution.

184 In accordance with existing animal models of drug addiction (Schulteis, Yackey,  
185 Risbrough, & Koob, 1998; Walf & Frye, 2007), withdrawal in the present study was  
186 operationalized as anxiety-like behavior, as measured on the EPM, following a period when  
187 the target solution was no longer available. A smaller proportion of time spent on the open  
188 arms can indicate greater anxiety in the rat (Walf & Frye, 2007).

### 189 **1. Experiment 1: Sucrose bingeing, withdrawal, and craving**

190 Experiment 1 aimed both to confirm the previous finding that giving rats every-fourth-  
191 day access to 4% sucrose solution (Binge group) can produce long-lasting elevations in  
192 sucrose intake even when switched to alternate-day access (Eikelboom & Hewitt, 2016) and  
193 to determine whether such binge-like sucrose consumption can produce withdrawal and  
194 craving. Eikelboom and Hewitt (2016) reported the persistence effect in their Experiment 1  
195 following a 49-day Phase 1 but not in their Experiment 2, where Phase 1 lasted only 10 days.  
196 An intermediate length of Phase 1 (28 days) was used in the present experiment. Two control  
197 groups were included: An Unrestricted group given access to 4% sucrose daily in Phase 1 and  
198 a Chow group that received only chow and water throughout. The latter served to clarify  
199 whether prolonged sucrose exposure in the Unrestricted group – independent of bingeing –  
200 would affect weight, chow intake, and performance on behavioral measures of withdrawal  
201 and craving.

202 Bingeing was operationalized as: 1) A greater escalation of intake across time in Phase 1,  
203 which is an indicator of bingeing in both addiction and binge models (Corwin & Babbs,  
204 2012) and; 2) greater sucrose consumption in a 24-h period by Binge rats than by  
205 Unrestricted rats under identical access conditions in Phase 2. Following the proposed  
206 relationship between bingeing and addiction (Avena, Rada, et al., 2008; Corwin & Babbs,  
207 2012), the Binge group was predicted to demonstrate greater withdrawal and craving than the  
208 Unrestricted group.

### 209 **2.1. Methods**

#### 210 *2.1.1. Animals.*

211 Thirty male Sprague-Dawley rats were purchased from the Animal Resource Centre  
212 (ARC), Perth. They were six weeks old, with an average weight of 221 g (range 200 – 254  
213 g), on arrival, when they were initially group-housed ( $n = 5/\text{cage}$ ) in open-topped cages (59 x  
214 36 x 19cm). The temperature- and humidity-controlled colony room was maintained on a

215 reversed 12-h light/dark cycle (lights off at 0800 hrs). On completion of the Pre-diet tests  
216 rats were transferred to single housing in open-topped shoebox cages (47 x 32 x 14 cm) to  
217 allow monitoring of individual chow and fluid intakes throughout the rest of the experiment.  
218 Body weight, chow intake, and water intake were measured every four days throughout the  
219 experiment. Target solution intakes were measured before and after the Binge rats' access  
220 day in Phase 1 and daily in Phase 2. Cage bedding was changed once or twice a week. Tap  
221 water (Sydney Water) and chow (Specialty Feeds ®, 14.2 kJ/g, Glen Forrest, WA) were  
222 available *ad libitum* throughout unless otherwise noted. All procedures were approved by the  
223 University of Sydney Animal Ethics Committee.

#### 224 2.1.2. Solutions

225 All target solutions were mixed based on a weight/volume (w/v) basis using tap water  
226 (Sydney Water). Sucrose solutions were mixed using commercially-available pure cane  
227 sugar (17 kJ/g). Maltodextrin solutions were mixed using maltodextrin (16kJ/g, Myopure  
228 Maltodextrin DE17; [www.myopure.com.au](http://www.myopure.com.au)). Almond-flavored solutions were mixed on a  
229 volume/volume (v/v) basis using almond essence (Queen).

#### 230 2.1.3 Apparatus

231 Ten operant chambers (MED Associates, East Fairfield, VT) were contained within  
232 sound-attenuated and ventilated cubicles. Each chamber contained two levers located on  
233 either side of the magazine, and the lever to the left of the magazine was active. Each active  
234 lever press produced 10-s access to 0.1 mL of 4% sucrose solution, delivered via a retractable  
235 dipper. Dipper presentations were accompanied by a 1-s tone and the chamber light turning  
236 off, indicating reinforcer availability. The magazine recesses contained infrared sensors that  
237 detected nose pokes. LabVIEW software (National Instruments, Austin, TX) controlled  
238 reinforcement schedules in these chambers.

239 For preference training and tests, ten acrylic cages (36 x 20 x 18 cm) fitted with lids and  
240 paper-pellet bedding were used as individual drinking chambers. 100-mL plastic bottles with  
241 ball-bearing stainless steel spouts contained drinking solutions and were inserted into the  
242 cages.

243 The elevated plus-maze (EPM) was composed of four arms (11 x 45 cm) intersecting at a  
244 central open square (10 x 10 cm) and elevated 80 cm above the floor. Two opposite arms  
245 (closed arms) were enclosed with opaque walls (40 cm high), and the other two arms (open  
246 arms) had no walls. During each session, the animals' behavior was recorded using a video  
247 camera mounted at a height of 1.15 m vertically above the center of the EPM.



248 *2.1.4 Procedure*

249 An outline of the procedure for Experiment 1 is summarized in Table 1.

250

251 Table 1. Design of Experiment 1.

252

| <b>Access conditions</b>         |                                                              |                                                             |                                                                   |                                                                          |
|----------------------------------|--------------------------------------------------------------|-------------------------------------------------------------|-------------------------------------------------------------------|--------------------------------------------------------------------------|
| <b>Group</b><br>( <i>n</i> = 10) | <i>Pre-diet</i><br><i>Phase</i><br>(28 days)                 | <i>Phase 1</i><br>(28 days)                                 | <i>Phase 2</i><br>(28 days)                                       | <i>Testing</i><br><i>Phase</i><br>(4 days)                               |
| <b>Binge</b>                     | Lever<br>press<br>training and<br>test, almond<br>preference | 23.5-h access to 4%<br>sucrose solution every<br>fourth day | 23.5-h<br>access to 4%<br>sucrose<br>solution every<br>second day | Lever press<br>test, almond<br>preference<br>test, sucrose<br>preference |
| <b>Unrestricted</b>              | test, sucrose<br>preference                                  | 23.5-h access to 4%<br>sucrose solution daily               |                                                                   | test, EPM<br>(see text<br>2.1.4.4)                                       |
| <b>Chow</b>                      | test (see text<br>2.1.4.1)                                   | Chow and water only                                         |                                                                   |                                                                          |

253 *2.1.4.1. Pre-diet Phase (Days 1-28)*

254 After five days of acclimatization and handling, the pre-diet phase began with chow  
255 restricted to 85 g per group cage per day, given after daily lever-press sessions and with water  
256 always available, except for 1 h before sessions.

257

258 *Lever press training (Days 1-28).* A 4% (w/v) sucrose solution reinforcer was used  
259 during training and test sessions throughout Experiment 1. Each magazine training and lever-  
260 press-training session lasted 30 min. Rats received two magazine training sessions where  
261 dipper presentations were on a fixed time (FT-30s) schedule. This resulted in successful  
262 magazine-training for all 30 rats, according to the criterion of making at least five magazine  
263 entries per session in both sessions.

264 Each rat was then given lever-press training using continuous reinforcement (FR-1).  
265 Training was considered successful when a rat made at least 25 lever presses within a session.  
266 Up to 18 sessions were given, and data from rats failing this criterion were excluded from

267 consequent analyses ( $n = 6$ ). Each rat then received four lever-press training sessions across  
268 four consecutive days (one session per day) using the following reinforcement schedules: VI-  
269 10s, VI-10s, VR-5, VR-5, where VI indicates a variable-interval and VR a variable-ratio  
270 schedule.

271 *Almond preference training and test (Days 10-12, 21)*. All preference training and test  
272 sessions lasted 10 min. Each rat received three training sessions across three consecutive  
273 days (one session per day) and one test session. Bottles were weighed before and after each  
274 session to calculate consumption to the nearest 0.1g.

275 For the initial training session, each rat was given a single bottle containing a 4% sucrose  
276 + 1% (v/v) almond solution. In the second and third sessions, each rat was given two bottles  
277 both containing the same sucrose + almond solution, and the positions of the bottles were  
278 exchanged after 5 min to acclimate rats to the two-bottle choice test procedure.

279 In the two-bottle choice test, a base solution of 1% (w/v) sucrose was used to ensure  
280 sufficient fluid consumption in both bottles, such that each rat was given a choice between  
281 one bottle containing the base solution (1% sucrose) and another bottle containing the base +  
282 almond solution (1% sucrose + 1% almond). The bottle positions were exchanged after 5  
283 min. The initial position of the bottle containing the base + almond solution was  
284 counterbalanced between groups. Almond preference was calculated as the consumption of  
285 the base + almond solution as a percentage of total fluid consumption (base + almond and  
286 base solution) in the two-bottle choice tests.

287 *Sucrose preference test (Day 25)*. Prior to this test, all rats were given overnight access to  
288 4% maltodextrin in their home cages to reduce a potential neophobic response in the  
289 subsequent test. The following day, each rat was given a two-bottle choice test between 4%  
290 sucrose and 4% maltodextrin using the procedure described previously for the almond  
291 preference test. In the first 5 min of each session, 4% maltodextrin was placed on the right  
292 and 4% sucrose was on the left. Sucrose preference was calculated as the consumption of 4%  
293 sucrose solution as a percentage of total fluid consumption (4% maltodextrin and 4%  
294 sucrose) in the two-bottle choice tests.

#### 295 *2.1.4.2. Phase 1 (Days 29-56)*.

296 Rats were allocated to three groups ( $n = 10$ /group) matched for body weight, almond  
297 preference and baseline lever-press responding. Over the 28 days of this phase the Binge  
298 group received 23.5-h access to 4% sucrose every fourth day, starting at 0930 hrs and ending  
299 at 0900 hrs the next day, while the Unrestricted group received 23.5-h access to 4% sucrose

300 daily. The Chow group were maintained on chow and water and never received sucrose  
301 access in the home cages.

#### 302 *2.1.4.3. Phase 2 (Days 57-84)*

303 Binge and Unrestricted groups were switched onto an alternate-day access schedule and  
304 given 23.5-h access to 4% sucrose every second day, starting at 0930 hrs and ending at 0900  
305 hrs the next day. The Chow group remained on chow and water only.

306 Lever-press tests were conducted during Phase 2 on days that rats did not receive access  
307 to sucrose (non-sucrose days). On two non-sucrose days at the beginning (Days 58, 60) and  
308 end of Phase 2 (Days 82, 84), chow was removed 3 h (at 0900 hrs) before each lever-press  
309 test session. At each time point, each rat was tested on a VI-10s schedule for 4% sucrose  
310 solution on the first non-sucrose day and on a VR-5 schedule on the next non-sucrose day.

311 Immediately following the VI-10s lever-press sessions (Days 58, 82) rats were tested for  
312 their almond preference using the two-bottle choice test previously described. Immediately  
313 following the VR-5 lever-press sessions (Days 60, 84) rats were tested for their preference for  
314 sucrose over maltodextrin.

#### 315 *2.1.4.4 Testing Phase (Days 85-88)*

316 On Day 85 five rats from each group (Non-staggered) were sucrose-deprived for 48 h,  
317 after which they underwent EPM testing (Day 86). The remaining rats (Staggered) received  
318 an extra day of sucrose access on Day 85, and similarly underwent EPM testing after 48-h  
319 sucrose-deprivation (Day 88). Each rat was tested on the EPM for 5 min, starting with an  
320 initial placement in the center of the EPM facing an open arm. The EPM was wiped down  
321 with 50% (v/v) ethanol after each rat.

322 All 30 EPM video recordings were scored by a non-blind experimenter, and the time each  
323 rat spent in the open arms, closed arms and central square was recorded. Behavior on the  
324 EPM was calculated as time spent on the open arms as a percentage of the total time spent on  
325 both arms. To establish inter-rater reliability, 15 of these recordings were rated by a blind  
326 scorer and intra-class reliability was run on the two sets of 15 scores.

#### 327 *2.1.5 Data Analysis*

328 All statistical analyses were conducted using SPSS v 24.0 using a  $p < .05$ . For the  
329 repeated-measures factors, the results were considered significant only if also significant  
330 when using the Greenhouse-Geisser correction for any violation of sphericity. For  
331 consumption data (sucrose solution intake, chow intake) and body weights, data from Phase 1  
332 and Phase 2 were analyzed separately using mixed ANOVAs. Sucrose solution intakes on  
333 common sucrose-access days were analyzed separately for each phase with mixed ANOVAs.

334 For several analyses of behavioral data, two planned orthogonal contrasts were carried  
335 out: (1) between the Chow and the two sucrose groups, and (2) between the Binge and  
336 Unrestricted groups.

337

## 338 **2.2. Results**

### 339 *2.2.1. Consumption data*

#### 340 *2.2.1.1. Chow and body weight*

341 As suggested by the mean daily chow intakes and body weights shown in Table 2, no  
342 group differences in chow intake were detected either during Phase 1 or Phase 2 ( $ps > .10$ ).  
343 There was a linear increase in body weight across the experiment (linear trend  $p < .001$ ), but  
344 at similar rates between the groups, with no group differences in body weight found either at  
345 the end of Phase 1 or end of Phase 2 ( $F_s < 1$ ).

346

347 Table 2. Mean ( $\pm$  SEM) daily chow intake during Phase 1 and 2 and mean ( $\pm$  SEM) body  
348 weight at the end of Phase 1 and 2 in Binge, Unrestricted and Chow groups in Experiment 1.

| Group ( $n =$<br>10) | Phase 1         |                | Phase 2         |                |
|----------------------|-----------------|----------------|-----------------|----------------|
|                      | Chow (g/d)      | Weight (g)     | Chow (g/d)      | Weight (g)     |
| <b>Binge</b>         | 28.5 $\pm$ 0.61 | 458 $\pm$ 16.7 | 26.8 $\pm$ 0.52 | 529 $\pm$ 23.6 |
| <b>Unrestricted</b>  | 27.0 $\pm$ 1.1  | 437 $\pm$ 11.0 | 26.2 $\pm$ 0.54 | 506 $\pm$ 13.8 |
| <b>Chow</b>          | 29.3 $\pm$ 0.52 | 472 $\pm$ 13.0 | 28.2 $\pm$ 0.75 | 533 $\pm$ 15.6 |

349

#### 350 *2.2.1.1. Sucrose solution consumption*

351 *Phase 1.* At the beginning of Phase 1, Binge and Unrestricted groups had similar sucrose  
352 intakes,  $t(18) = 1.31$ ,  $p > .10$  (see Figure 1). Thereafter, intakes remained stable in the  
353 Unrestricted group, while by the end of Phase 1 the Binge group came to consume more than  
354 twice the amount of sucrose in a 23.5-h period than the average for the Unrestricted group. A  
355 3 x (7) Day x Group mixed ANOVA revealed a main effect of Group,  $F(1, 18) = 166.8$ ,  $p <$   
356  $.001$ , and a linear trend in sucrose intake across days,  $F(1, 18) = 12.36$ ,  $p = .002$ . This linear  
357 trend interacted with Group and Day,  $F(1, 18) = 8.24$ ,  $p = .01$ . To clarify the nature of the  
358 interaction, separate trend analyses were conducted for the Binge and Unrestricted groups.  
359 The Binge group showed a linear trend in sucrose intake,  $F(1, 9) = 11.82$ ,  $p = .007$ , which  
360 was not found in the Unrestricted group,  $F < 1$ , confirming that the Binge group escalated  
361 their sucrose intake across Phase 1, whereas the Unrestricted group did not.

362 *Phase 2.* Sucrose intakes in the Binge group decreased over the first three days of Phase 2,  
363 before returning to the elevated sucrose intakes found at the end of Phase 1 (see Figure 1).  
364 The Unrestricted group increased their sucrose intake across Phase 2 but continued to  
365 maintain lower intakes than the Binge group throughout the 28 days of alternate-day access.  
366 The 2 x (13) Group x Day mixed ANOVA revealed a significant linear trend in sucrose  
367 intake across days,  $F(1, 18) = 21.75, p < .001$ , a Group,  $F(1, 18) = 5.62, p = .03$  and Group by  
368 Day interaction effect,  $F(12, 216) = 2.72, p = .03$ .

369 As the Binge group displayed a transient decrease in sucrose intakes at the beginning of  
370 Phase 2, separate analyses were carried out for the first and last halves of this phase to assess  
371 the eventual stability of group intake differences. A 2 x (6) Group x Day mixed ANOVA  
372 was conducted for the first six access days and a 2 x (7) Group x Day mixed ANOVA was  
373 conducted for the last seven access days of Phase 2. The 2 x (6) mixed ANOVA revealed  
374 Group,  $F(1, 18) = 6.76, p = .02$  and interaction effects,  $F(5, 90) = 6.45, p = .004$ . There were  
375 significant linear and quadratic trends in sucrose intake across groups, and an interaction in  
376 quadratic trend,  $F(1, 18) = 18.33, p < .001$ . The 2 x (7) mixed ANOVA confirmed that  
377 sucrose intake across the last seven days did not significantly increase across days, averaged  
378 across groups ( $p > .10$ ) nor was there a Group-by-Day interaction,  $F < 1$ . Averaged over  
379 these last seven days, sucrose intake was significantly higher in the Binge group ( $M = 151.0$ )  
380 than the Unrestricted group ( $M = 98.5$ ), confirming that the Binge group maintained elevated  
381 sucrose intakes relative to the Unrestricted group in the second half of Phase 2.

382

383

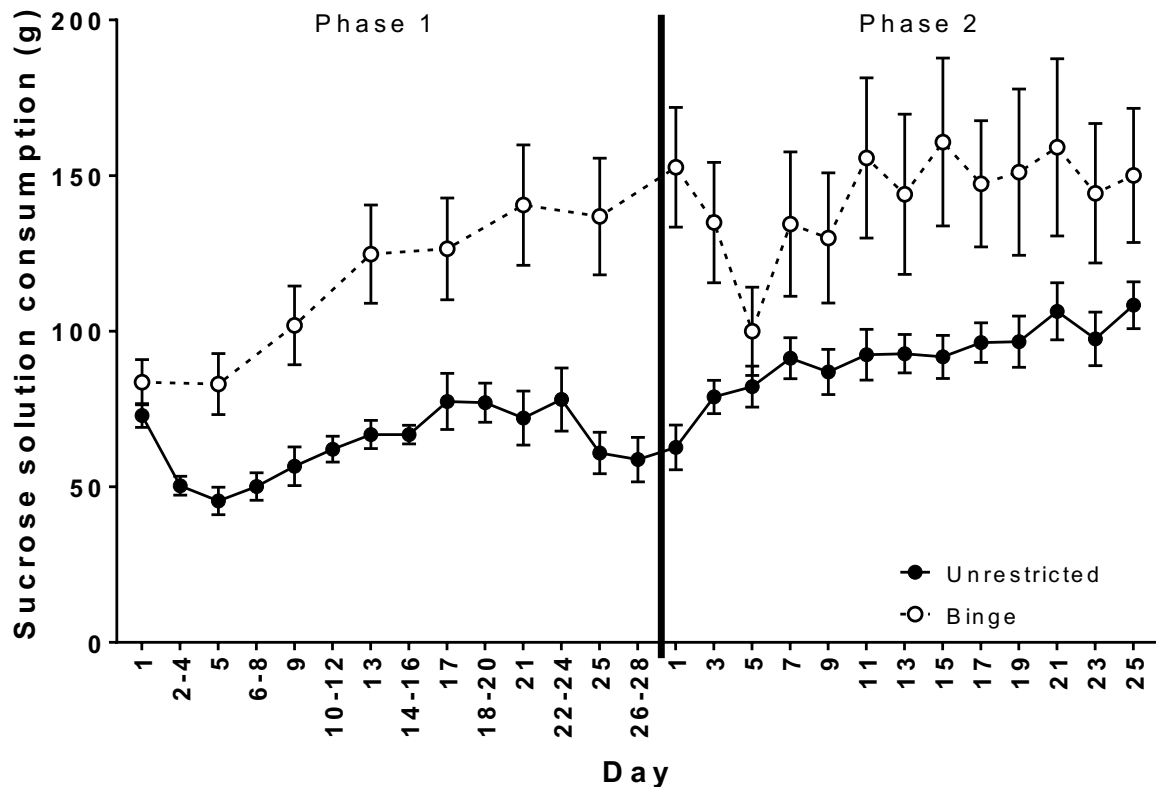

384

385 *Figure 1.* Mean ( $\pm$  SEM) 4% sucrose solution intake in rats given 23.5-h access either  
386 every fourth day (Binge) or daily (Unrestricted) in Phase 1. In Phase 2, both groups were  
387 given 4% sucrose every second day. Sucrose intakes shown are the amount of sucrose  
388 solution consumed in a 23.5-h period. NB: days labelled in this figure correspond to day of  
389 the respective phase and not the experimental day.

### 390 2.2.2 Behavioral data

391 In summary, behavioral tests of 'craving' and 'withdrawal' did not yield any differences  
392 between Unrestricted and Binge groups, despite the binge-like sucrose consumption exhibited  
393 by the latter.

#### 394 2.2.2.1 Lever-press responding

395 The mean number of lever presses during the two VR-5 sessions in the Pre-diet Phase was  
396 taken as the measure of baseline responding, while response rates at the end of Phases 1 and 2  
397 were based on a single VR-5 session. These data analyzed using a 3 x (3) Group x Test  
398 mixed ANOVA which revealed a significant Test effect,  $F(2, 42) = 10.22, p < .001$ , but no  
399 effect of Group,  $p > .10$ , while the Test by Group interaction only approached significance,  
400  $F(4, 42) = 2.13, p = .09$ . Planned contrasts revealed that at the end of Phase 1, lever-press  
401 responding was significantly higher in the Chow group ( $M = 144.00$ ) than in the Binge and

402 Unrestricted groups on average, ( $M = 72.69$ ),  $F(1, 21) = 4.97$ ,  $p = .037$ ; however, no  
403 difference between Binge and Unrestricted groups was found,  $F < 1$ . Remaining planned  
404 contrasts failed to find differences between sucrose and Chow groups, and between Binge  
405 and Unrestricted groups at baseline and the end of Phase 2, all  $ps > .10$ .

#### 406 2.2.2.2 Almond preference

407 Almond preferences are shown in Figure 2A. A 3 x (3) Group x Test mixed ANOVA  
408 revealed a significant effect of Group,  $F(2, 27) = 8.10$ ,  $p = .002$ . No other main effects or  
409 interactions were found,  $ps > .10$ . Planned contrast analyses failed to find any difference in  
410 the groups' almond preferences at baseline,  $F < 1$ . At the end of Phase 1, almond preferences  
411 were significantly higher in the sucrose groups (Binge and Unrestricted on average,  $M =$   
412  $68.02\%$ ) than the Chow group ( $M = 55.41\%$ ),  $F(1, 27) = 4.48$ ,  $p = .04$ ; however, no  
413 difference between the Binge and Unrestricted groups was detected,  $F < 1$ . Similarly at the  
414 end of Phase 2, almond preferences were higher in the sucrose groups (Binge and  
415 Unrestricted on average,  $M = 72.03\%$ ) than in the Chow group ( $M = 51.83\%$ ),  $F(1, 27) =$   
416  $10.29$ ,  $p = .003$ , but again no difference between the Binge and Unrestricted groups was  
417 detected,  $F < 1$ .

#### 418 2.2.2.3 Sucrose preference

419 Mean sucrose preference data are shown in Figure 2B. A 3 x (3) Group x Test mixed  
420 ANOVA on sucrose preference revealed a significant Group effect,  $F(2, 27) = 3.86$ ,  $p = .03$ .  
421 There was no Test effect or interaction,  $Fs < 1$ . At baseline, planned contrasts failed to find  
422 differences in sucrose preference between sucrose and Chow groups,  $F < 1$ , nor were there  
423 differences between Binge and Unrestricted groups,  $p > .10$ . At the end of Phase 1, sucrose  
424 preference did not significantly differ between sucrose and Chow groups,  $F < 1$ . However,  
425 the Binge group showed significantly higher sucrose preference than the Unrestricted group,  
426  $F(1, 27) = 5.96$ ,  $p = .02$ . At the end of Phase 2, sucrose preference did not differ between  
427 sucrose and Chow groups, nor were there differences between Binge and Unrestricted groups,  
428  $ps > .05$ .

#### 429 2.2.2.4 Elevated plus-maze (EPM)

430 The intra-class correlation coefficient was  $.99$ ,  $p < .001$ , indicating high inter-rater  
431 reliability. A one-way ANOVA failed to find group differences in the time spent on the open  
432 arms of the maze as a percentage of total time spent on the arms,  $p > .10$ , suggesting that  
433 groups demonstrated similar levels of anxiety on the EPM following 48-h sucrose  
434 deprivation. The mean percentage of open arm time was 16% in the Chow group, 26% in the  
435 Binge group, and 16% in the Unrestricted group.

436

437

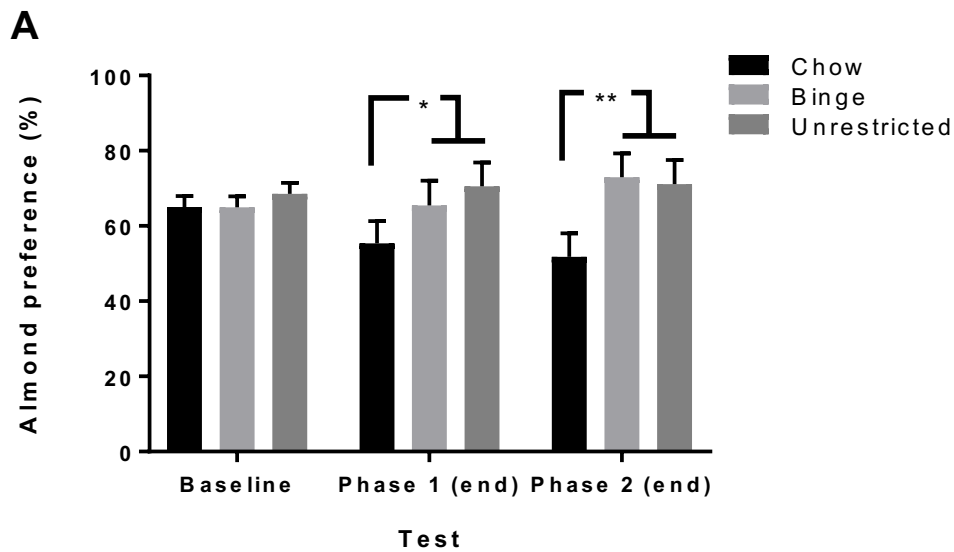

438

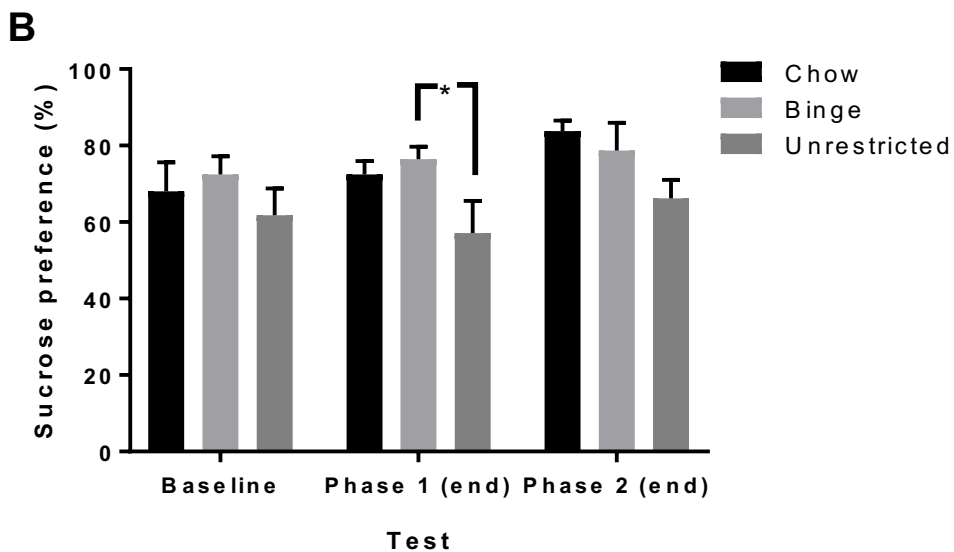

439

440

441 *Figure 2.* Behavioral data for Experiment 1. A) Mean ( $\pm$  SEM) almond preference in rats  
442 at baseline, end of Phase 1 and end of Phase 2. Almond preference was elevated in sucrose  
443 groups (Binge and Unrestricted) relative to the Chow group at the end of Phase 1 and 2 ( $p >$   
444  $.05$ ). B) Mean ( $\pm$  SEM) preference for sucrose over maltodextrin in rats measured at  
445 baseline, end of Phase 1 and end of Phase 2. The Binge group displayed higher sucrose  
446 preference than the Unrestricted group at the end of Phase 1 ( $p > .05$ ) but this difference  
447 disappeared at the end of Phase 2,  $p > .10$ . \*  $p < .05$  \*\*  $p < .01$ .



### 448 **2.3. Discussion**

449 Experiment 1 successfully replicated the persistent elevations in sucrose consumption  
450 found in Eikelboom and Hewitt (2016)'s study using a modification of their protocol,  
451 whereby the length of Phase 1 was reduced from their 49 days (Eikelboom & Hewitt, 2016;  
452 Experiment 1) to the present 28 days. In the Binge group intake of 4% sucrose during Phase  
453 1 increased to almost three times the daily intake of the Unrestricted group, and this  
454 difference in intake was still evident after the 28 days of Phase 2. The elevated intakes  
455 exhibited by the Binge group satisfied the criteria for binge-like consumption; intakes  
456 gradually escalated during Phase 1 and 23.5-h intakes were larger in the Binge group relative  
457 to the Unrestricted group under identical access conditions in Phase 2. It may be noted,  
458 however, that the absolute amounts of sucrose solution consumed by the Binge group did not  
459 reach the level reported by Eikelboom and Hewitt; whereas their Binge group reached a mean  
460 of around 300 ml per day after 28 days, the present Binge group reached only 150 ml per day.

461 A novel feature of this experiment was to add behavioral measures of 'withdrawal' and  
462 'craving' to the Eikelboom protocol. Although such measures in previous studies have  
463 suggested a relationship between sugar bingeing and addiction-like behavior (Avena, Rada, et  
464 al., 2008), no such evidence was found in the present experiment. The Binge and  
465 Unrestricted groups displayed similar anxiety-like behavior after a 48-h withdrawal period  
466 from sucrose, similar motivation to obtain sucrose, and similar preferences for a sucrose-  
467 associated flavor. The Binge group only differed from the Unrestricted group in their higher  
468 preference for sucrose over maltodextrin at the end of Phase 1 but this difference disappeared  
469 by the end of Phase 2. This suggests that intermittent access during Phase 1 may have  
470 produced a transient increase in the hedonic value of sucrose. but cannot account for the  
471 persistence of binge-like sucrose consumption in the Binge group. It is possible that this  
472 experiment failed to find group differences in 'craving' because these measures were  
473 administered during the diet-intervention instead of sugar withdrawal, as conducted in other  
474 studies (Avena et al., 2005). The Chow group may have been more motivated to obtain  
475 sucrose than the Binge and Unrestricted groups because they did not receive sucrose in their  
476 home cages.

477

478

479

480

### 481 **3. Experiment 2: Taste or caloric intake?**

482 The main purpose of Experiment 2 was to determine the relative importance of the taste,  
483 i.e. sweetness, and of the caloric value of sucrose in producing the persistent bingeing effect  
484 demonstrated in Experiment 1. Eikelboom and Hewitt (2016) concluded from their third  
485 experiment that intermittent access delays satiety signals. In their experiment, a lick-by-lick  
486 analysis of sucrose consumption revealed that the intermittent group had consistently larger  
487 sucrose meals compared to the continuous group, but both groups had similar meal  
488 initiations. Thus, it appears that the intermittent group engaged in binge-like consumption  
489 because they required larger amounts to reach satiety. This suggests then that the caloric  
490 value, rather than the taste, of sucrose is a greater driving force behind the persistent bingeing  
491 effect.

492 The basic method used in this second experiment was similar to that used in Experiment  
493 1. The most important changes were to replace 4% sucrose with an isohedonic 0.4%  
494 saccharin (non-caloric sweetener) (Young & Trafton, 1964) in two groups (Saccharin  
495 Unrestricted; SU, Saccharin Binge; SB), and with an isocaloric 4% maltodextrin (non-sweet,  
496 caloric polysaccharide) solution in two further groups (Maltodextrin Unrestricted; MU,  
497 Maltodextrin Binge; MB). As detailed below, following a collapse of the bingeing effect in  
498 Phase 2, the design was modified to include a third phase (see Table 2).

499 Experiment 2 used similar behavioral measures of withdrawal and craving to those in  
500 Experiment 1: 1) lever pressing on a VR reinforcement schedule; 2) preference for a  
501 maltodextrin- or saccharin-paired flavor (i.e. almond) and; 3) preference for maltodextrin or  
502 saccharin over an equally attractive sucrose solution. However, in the present experiment  
503 post-tests for these measures were conducted after a 7-day withdrawal period following the  
504 diet-intervention. As in Experiment 1, possible withdrawal-induced anxiety was measured on  
505 the EPM.

506 It was predicted that during Phase 1, the two Binge groups receiving every-fourth-day  
507 access to saccharin (SB) or maltodextrin (MB) would escalate their daily intakes relative to  
508 their Unrestricted counterparts (SU and MU groups). Of particular interest was whether  
509 elevated consumption in the SB and MB groups would persist during Phase 2, when, as in  
510 Experiment 1, both Binge and Unrestricted groups were transferred to the same alternate-day  
511 schedule.

512

513

514 **3.1. Methods**

515 *3.1.1. Animals*

516 Forty experimentally-naïve male Sprague-Dawley rats from the same source as  
517 Experiment 1 were six weeks old, with an average weight of 308 g (range 285-330 g), on  
The timeline of Experiment 2 is outlined in Table 3.

518 arrival and were initially group-housed ( $n = 5/\text{cage}$ ). As previously, the temperature- and  
519 humidity-controlled colony room was maintained on a reversed 12-h light/dark cycle (lights  
520 off at 0900 hrs). After two days of acclimatization and handling, the Pre-diet Phase began  
521 with chow and water restrictions identical to those described for Experiment 1. Other details  
522 were the same as described for Experiment 1.

523 *3.1.2. Solutions*

524 Sucrose and maltodextrin solutions were prepared as described for Experiment 1. The  
525 0.4% (w/v) saccharin sodium solution was prepared using saccharin sodium salt hydrate  
526 (SSSH; Sigma-Aldrich, S-1002) in the Pre-diet Phase and the majority of Phase 1. Due to a  
527 shortage of SSSH in the laboratory at the end of Phase 1, there was an unplanned switch to a  
528 ~0.4% (w/v) pure (acid-free) saccharin solution (Sigma-Aldrich, 240931).

529 *3.1.3. Apparatus*

530 The apparatus was identical to that used in Experiment 1.

531 *3.1.4. Procedure*

532 Table 3. Experimental design of Experiment 2. \*Maltodextrin Binge  $n = 9$  in Phase 2 and 3.

533

534

535

536

| Group<br>( $n = 10^*$ )               | Access conditions                                                                                                |                                                                           |                                                            |                                                            |                                                |                                                                                 |
|---------------------------------------|------------------------------------------------------------------------------------------------------------------|---------------------------------------------------------------------------|------------------------------------------------------------|------------------------------------------------------------|------------------------------------------------|---------------------------------------------------------------------------------|
|                                       | <i>Pre-diet</i><br><i>Phase</i><br>(25 days)                                                                     | <i>Phase 1</i><br>(28 days)                                               | <i>Phase 2</i><br>(28 days)                                | <i>Phase 3</i><br>(9 days)                                 | <i>Withdrawal</i><br><i>period</i><br>(7 days) | <i>Testing</i><br><i>Phase</i><br>(11 days)                                     |
| <b>Maltodextrin Unrestricted (MU)</b> |                                                                                                                  | 23.5-h access to 4% maltodextrin solution daily                           | 23.5-h access to 4% maltodextrin solution                  | 23.5-h access to 4% maltodextrin solution daily            |                                                | Lever press test, almond preference test,                                       |
| <b>Maltodextrin Binge (MB)</b>        | Lever press training and test, almond preference test, maltodextrin/saccharin preference test (see text 3.1.4.1) | 23.5-h access to 4% maltodextrin solution every fourth day                | 23.5-h access to 4% maltodextrin solution every second day | 23.5-h access to 4% maltodextrin solution every fourth day | Chow and water only                            | almond preference test, maltodextrin in preference test, EPM (see text 3.1.4.6) |
| <b>Saccharin Unrestricted (SU)</b>    |                                                                                                                  | 23.5-h access to 0.4% saccharin sodium salt hydrate (SSSH) solution daily | -                                                          | -                                                          | -                                              | -                                                                               |
| <b>Saccharin Binge (SB)</b>           |                                                                                                                  | 23.5-h access to 0.4% SSSH every fourth day                               |                                                            |                                                            |                                                |                                                                                 |

537 3.1.4.1. *Pre-diet phase (Days 1-25)*

538 Rats were first allocated to two weight-matched conditions ( $n = 20$ /condition) and

539 received either saccharin or maltodextrin solutions throughout the experiment.

540 *Lever press training (Days 1-24).* Rats were initially reinforced using a 10% (w/v)  
541 sucrose solution. Criteria and procedures for successful magazine training and lever-press  
542 training were identical to those in Experiment 1. Up to 18 sessions were given, with data  
543 from rats still failing training criterion excluded from consequent analyses ( $n = 5$ ). Rats then  
544 received two sessions of VI-10s lever-press training across two days. The first session used a  
545 10% sucrose solution reinforcer. The second session used 4% (w/v) maltodextrin solution as  
546 the reinforcer for rats in the Maltodextrin condition, and a 0.4% saccharin solution reinforcer  
547 for rats in the Saccharin condition. Rats then received VR-5 lever-press sessions on two  
548 successive days.

549 *Almond preference training and test (Days 3-6).* The procedure was identical to that of  
550 Experiment 1, except that the Maltodextrin rats were trained using a 4% (w/v) maltodextrin +  
551 1% (v/v) almond solution and the Saccharin rats were trained using a 0.4% SSSH (w/v) + 1%  
552 (v/v) almond solution. During the two-bottle choice tests, the base solution in the  
553 Maltodextrin condition was 1% (w/v) maltodextrin, and in the Saccharin condition was 0.1%  
554 (w/v) SSSH solution. Each rat was given a two-bottle choice test between almond + base and  
555 base only. Other details were the same as for Experiment 1.

556 *Target solution preference test (Day 8).* Each rat received a preference test using the  
557 procedure described in Experiment 1. The Maltodextrin rats were given a two-bottle choice  
558 test between 4% maltodextrin and 4% sucrose, while those in the Saccharin condition were  
559 given a two-bottle choice test between 0.4% SSSH and 2% sucrose. The choice of a 2%  
560 sucrose solution in the latter test was to avoid a possible floor effect, since pilot tests had  
561 indicated that comparison with a 4% sucrose solution produced a low saccharin preference  
562 (~23%). In the first half of each test session, maltodextrin or saccharin was placed on the left  
563 and sucrose was placed on the right. Maltodextrin preference was calculated as the  
564 consumption of 4% maltodextrin solution as a percentage of total fluid consumption (4%  
565 maltodextrin and 4% sucrose) in the two-bottle choice tests. Saccharin preference was  
566 calculated as the consumption of 0.4% saccharin solution as a percentage of total fluid  
567 consumption (0.4% saccharin and 2% sucrose) in the two-bottle choice tests.

#### 568 *3.1.4.2. Phase 1 (Days 26-53)*

569 At the start of this phase rats in the Maltodextrin condition were allocated to two groups  
570 ( $n = 10$ /group) matched primarily for body weight and almond preference but also to a lesser  
571 degree for sucrose preference and lever-press responding. One group was labeled the  
572 Maltodextrin Binge (MB) group; this was given 23.5-h access to 4% maltodextrin solution  
573 every fourth day, starting at 1000 hrs and ending at 0930 hrs the next day. The other was

574 labeled the Maltodextrin Unrestricted (MU) group; this received 23.5-h access to 4%  
575 maltodextrin solution daily.

576 Rats in the Saccharin condition were similarly allocated to two matched groups ( $n =$   
577 10/group). The Saccharin Binge (SB) group received 23.5-h access to 0.4% SSSH solution  
578 every fourth day, starting at 1000 hrs and ending at 0930 hrs the next day, while the  
579 Saccharin Unrestricted (SU) group received 23.5-h access to 0.4% SSSH solution daily. Due  
580 to an unavailability of SSSH at the end of Phase 1, there was an unplanned switch to pure  
581 saccharin solutions. This caused an abrupt decrease in saccharin intakes in the SU group on  
582 the last 3 days of Phase 1 (see Figure 3). Consequently, only Phase 1 data will be reported  
583 here for the SB and SU groups.

584 *3.1.4.3. Phase 2 (Days 54-69): MB and MU groups only.*

585 The MB and MU groups were switched to an alternate-day access schedule such that they  
586 received 23.5-h access to 4% maltodextrin every second day from 1000 hrs to 0930 hrs the  
587 next day.

588 *3.1.4.4. Phase 3 (Days 70-78): MB and MU groups only.*

589 As detailed below (see Section 3.2.1.1), the intake difference between the MB and MU  
590 groups seen in Phase 1 collapsed during Phase 2. Consequently, a third phase was added in  
591 which the groups were switched back to their Phase 1 conditions for nine days in an attempt  
592 to reinstate binge-like consumption. Thus, the MB group was again given 23.5-h access to  
593 4% maltodextrin every fourth day, whereas the MU group was again given 23.5-h access to  
594 4% maltodextrin daily.

595 *3.1.4.5. Withdrawal period (Days 79-85): MB and MU groups only.*

596 During this one-week period no further access to maltodextrin solution was given and  
597 rats were maintained on *ad libitum* chow and water only.

598 *3.1.4.6. Testing phase (Day 86-96): MB and MU groups only.*

599 On Day 85, chow was removed at 1700 hrs to mimic the mild food deprivation induced  
600 during baseline tests in the Pre-diet Phase. From Day 86-88 each rat was given three lever-  
601 press sessions over three successive days (one session/day), using the following  
602 reinforcement schedules: VI-10s, VR-5, VR-5. The average number of lever presses over the  
603 two VR-5 sessions was taken as the after-withdrawal measure of lever-press responding. On  
604 Day 91 rats were tested for almond preference using the two-bottle choice test procedure.  
605 The next day rats were also tested for preference for maltodextrin over 4% sucrose solution  
606 as previously described. During these test days, rats were given 2-h daily chow access at  
607 1400 hrs (after their daily lever-press session or two-bottle choice test). Rats were returned to

608 *ad libitum* chow on Day 93 before EPM testing. On Day 94 each rat was tested on the EPM  
609 following the procedure described for Experiment 1. Behavior on the EPM was scored and  
610 calculated as described for Experiment 1. To establish inter-rater reliability, ten EPM  
611 recordings were also rated by a blind scorer and intra-class reliability between the two sets of  
612 ten scores was measured.

### 613 *3.1.5. Data analysis*

614 One rat from the MB group died during Phase 2 and its data were excluded from all  
615 analyses subsequent to Phase 1. As detailed earlier, only target solution intake data from  
616 Phase 1 was analyzed for the SB and SU groups and no other intake or behavioral data are  
617 reported for these groups. Due to the change in access conditions between phases, target  
618 solution intakes on common access days were analyzed separately for each phase with mixed  
619 ANOVAs. Since motivational states may have differed across tests of lever-pressing and  
620 flavor preferences due to differences in the degree of food deprivation, overall changes across  
621 tests were not considered meaningful and consequently only data from after-withdrawal tests  
622 were analyzed using one-way ANOVAs.

623

## 624 **3.2. Results**

### 625 *3.2.1. Pre-diet measures*

626 Although the concentrations of saccharin and maltodextrin in the present experiment were  
627 chosen to match the hedonic and caloric value of 4% sucrose, data from the pre-diet measures  
628 suggested that 0.4% saccharin was a more effective reinforcer than 4% maltodextrin. During  
629 lever-press training and baseline test where rats were reinforced with their target solution i.e.  
630 0.4% saccharin or 4% maltodextrin, rats in the Saccharin condition had higher average lever-  
631 press responding on a VR-5 reinforcement schedule than rats in the Maltodextrin condition  
632 (148 vs. 87), however this only approached significance ( $p = .05$ ).

### 633 *3.2.2. Consumption data*

#### 634 *3.2.2.1. Chow and body weight*

635 As suggested by Table 4, there were no main effects on chow intake but there was a  
636 significant Solution x Access interaction ( $F(1, 36) = 87.0, p < .001$ ) such that the MU group  
637 had lower chow intakes than the MB group, whereas no difference in chow intakes was  
638 detected between the SU and SB groups. This suggests that the MU group reduced chow  
639 intake to compensate for the additional caloric intake from unrestricted access to a caloric  
640 maltodextrin solution, whereas this was unnecessary for the SU group because the saccharin  
641 solution contained no calories. In Phase 2 and Phase 3 there were no differences in daily

642 chow intake between MU and MB groups ( $p > .05$ ). Body weights gradually increased across  
 643 the experiment, but no group differences were found ( $ps > .10$ ).

644 Table 4. Mean ( $\pm$  SEM) daily chow intake during Phases 1-3, and mean ( $\pm$  SEM) body  
 645 weight at the end of Phase 1-3 in MU and MB groups in Experiment 2. Data for SU and SB  
 646 groups are shown only for Phase 1 (see section 3.1.4.2 for details). \*Maltodextrin Binge  $n =$   
 647 9 in Phase 2 and 3.

| Group ( $n = 10^*$ )                      | Phase 1       |               | Phase 2       |               | Phase 3       |               |
|-------------------------------------------|---------------|---------------|---------------|---------------|---------------|---------------|
|                                           | Chow<br>(g/d) | Weight<br>(g) | Chow<br>(g/d) | Weight<br>(g) | Chow<br>(g/d) | Weight<br>(g) |
| <b>Maltodextrin<br/>Unrestricted (MU)</b> | 25.6 $\pm$    | 472 $\pm$     | 24.1 $\pm$    | 507 $\pm$     | 24.5 $\pm$    | 528 $\pm$     |
| <b>Maltodextrin<br/>Binge (MB)</b>        | 0.68          | 16.1          | 0.57          | 21.2          | 0.49          | 22.8          |
| <b>Maltodextrin<br/>Unrestricted (SU)</b> | 28.9 $\pm$    | 490 $\pm$     | 26.8 $\pm$    | 522 $\pm$     | 27.7 $\pm$    | 542 $\pm$     |
| <b>Saccharin<br/>Unrestricted (SU)</b>    | 0.36          | 14.8          | 0.59          | 20.4          | 0.28          | 21.3          |
| <b>Saccharin<br/>Binge (SB)</b>           | 29.3 $\pm$    | 483 $\pm$     | -             | -             | -             | -             |
| <b>Saccharin Binge<br/>(SB)</b>           | 0.68          | 15.3          | -             | -             | -             | -             |
|                                           | 28.1 $\pm$    | 467 $\pm$     | -             | -             | -             | -             |
|                                           | 0.61          | 15.0          |               |               |               |               |

649

### 650 3.2.2.2. Target solution consumption

651 *Phase 1.* Mean daily intakes of target solutions on access days are shown in Figure 3. No  
 652 group differences were found in solution intakes on Day 1 of Phase 1,  $p > .10$ . Subsequently,  
 653 MB and SB groups came to consume increasing amounts of their target solution, whereas no  
 654 increases in the daily intakes by the MU and SU groups were found. Intakes of saccharin  
 655 were generally greater than intakes of maltodextrin. However, saccharin intakes dropped due  
 656 to a switch in saccharin solutions on Day 26 of Phase 1. This description of the results was  
 657 confirmed by a 2 x 2 x (7) Solution x Access x Day mixed ANOVA that revealed a main  
 658 effect of Day,  $F(6, 216) = 4.70, p < .001$ , and a Day by Access interaction effect  $F(6, 216) =$   
 659 8.35,  $p < .001$ . There were main effects of Solution (maltodextrin vs. saccharin),  $F(1,36) =$   
 660 5.33,  $p = .027$  and of Access (unrestricted vs. binge),  $F(1,36) = 16.01, p < .001$ , revealing that  
 661 SU and SB groups had higher intakes than the MU and MB groups (80.25g vs. 65.27g, on  
 662 average), and that MB and SB groups drank considerably more than MU and SU groups  
 663 (85.75g vs. 59.78g, on average), averaged over solution.



664 There was a significant linear trend of intake across days,  $F(1,36) = 16.90, p < .001$ . This  
665 trend interacted with Access ( $F(1, 336) = 19.30, p < .001$ ), suggesting that the pattern of  
666 intake across days differed between groups receiving unrestricted access (SU, MU) and those  
667 receiving binge access (SB, MB). To clarify the nature of the interaction, separate trend  
668 analyses were conducted for access conditions. For unrestricted-access groups (MU and SU),  
669 there was no significant trend in intakes across days,  $ps > .10$ . For binge-access groups (MB  
670 and SB), there was a significant linear trend in intake,  $F(1, 18) = 28.44, p < .001$ .

671 The Solution by Access interaction was not significant,  $p > .10$ , indicating that the degree  
672 to which the binge condition elevated intakes above those in the unrestricted condition was  
673 not detectably different between maltodextrin and saccharin. On average MB rats came to  
674 consume 1.5 times the amount of maltodextrin relative to the MU rats, whereas SB rats came  
675 to consume almost twice the amount of saccharin relative to SU rats.

676 *Phase 2.* As seen in Figure 3, within three alternative-day exposures in Phase 2 there were  
677 no longer any differences in intakes between the MB and MU groups and they remained  
678 similar until the end of the phase. A 2 x (8) Access x Day mixed ANOVA revealed  
679 significant linear,  $F(1, 17) = 32.23, p < .001$  and quadratic,  $F(1, 17) = 39.83, p < .001$  trends  
680 in maltodextrin intake across days. There were also significant interactions in linear,  $F(1, 17)$   
681  $= 6.29, p = .023$ , and quadratic,  $F(1, 17) = 7.93, p = .012$ , trends between Day and Access.  
682 There was no Access effect ( $F < 1$ ), which confirms that the MB and MU groups did not  
683 differ in terms of maltodextrin intakes in Phase 2.

684 *Phase 3.* The results shown for Phase 3 of Figure 3 suggest that MU and SU rats decreased  
685 their intakes upon reinstatement of unrestricted access, while MB and SB rats maintained  
686 higher intakes when given every-fourth-day access. However, a 2 x (3) Group x Day mixed  
687 ANOVA revealed only linear,  $F(1, 17) = 5.52, p = .031$ , and quadratic trends,  $F(1,17) =$   
688  $20.96, p < .001$ , but no other main effects or interactions,  $ps > .10$ . Thus, binge-like  
689 consumption in the MB group relative to the MU group was not reinstated in Phase 3.

### 690 3.2.3. Behavioral data

691 In summary, no differences were found between the MB and MU group on any of the  
692 behavioral measures. A one-way ANOVA applied to lever-press rates did not find any Group  
693 effect ( $F < 1$ ), indicating that both MU and MB groups exhibited similar lever-press  
694 responding after withdrawal. Mean almond preference data are shown in Figure 4A. A one-  
695 way ANOVA on almond preference after withdrawal confirmed that there was no difference  
696 between the MU and MB groups ( $F < 1$ ). Mean target solution preference data are shown in  
697 Figure 4B. As seen in this figure, the preference for maltodextrin over sucrose was similar

698 after withdrawal in the MU and MB,  $p > .10$ . When videos of performance on the elevated  
699 plus maze were scored, the intra-class correlation coefficient was .99,  $p < .001$ , indicating  
700 very high inter-rater reliability. Average open-arm time was 10.3% in the MU group and  
701 14.6% in the MB group. A one-way ANOVA failed to find differences between the MU and  
702 MB groups in the percentage of time spent on the open arms of the maze ( $F < 1$ ), suggesting  
703 that MB and MU rats exhibited similar levels of anxiety-like behavior. It should be noted  
704 that these low open-arm times suggest that both groups were relatively anxious.

705

706

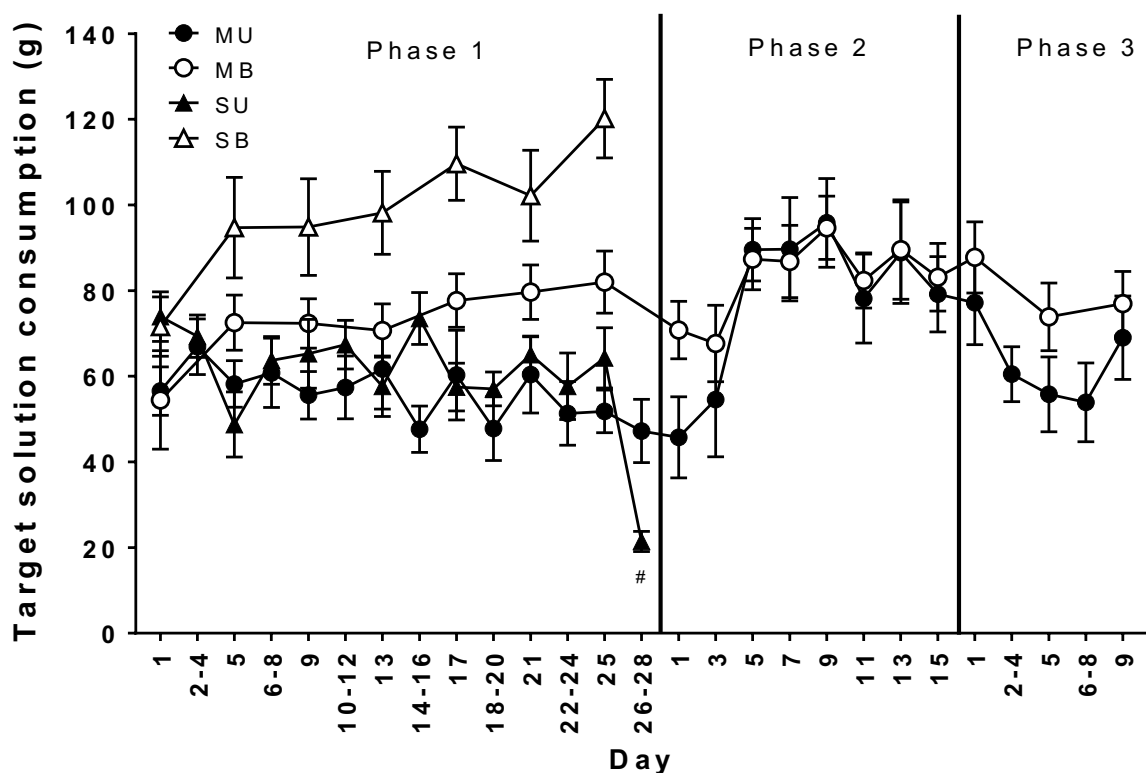

707

708 *Figure 3.* Mean ( $\pm$  SEM) 4% maltodextrin (MU, MB) or 0.4% saccharin (SU, SB)  
709 intakes in a 23.5-h period in rats given 23.5-h access every fourth day (MB, SB) or daily  
710 (MU, SU) in Phase 1. In Phase 2, the MB and MU groups were given 23.5-h access to 4%  
711 maltodextrin solution every second day. In Phase 3, MB and MU groups were returned to  
712 their respective Phase 1 access schedules. Both Binge groups (MB, SB) drank significantly  
713 greater amounts by the end of Phase 1 relative to their Unrestricted counterparts (MU, MB),  $p$   
714  $< .001$ . The intake difference between MU and MB groups disappeared in Phase 2 ( $F < 1$ ),  
715 and was not reinstated in Phase 3 ( $p > .10$ ). # indicates that this drop in intakes followed an  
716 unplanned switch from SSSH solution to pure saccharin solution in SU group; the SU and SB

717 groups were dropped from Experiment 2 because of SSSH unavailability and subsequent data  
718 have not been reported. NB: Days in this figure indicate the day of each respective phase and  
719 do not correspond to the experimental day.  
720

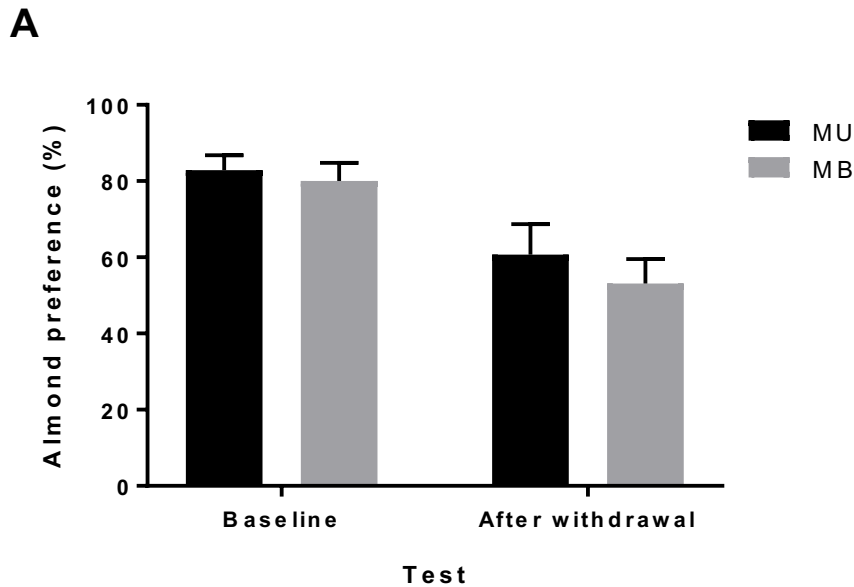

721

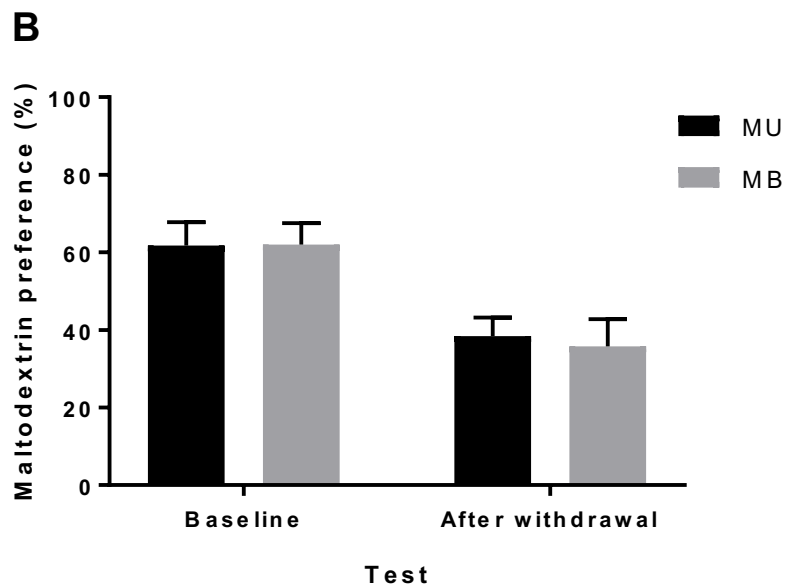

722

723 *Figure 4.* Behavioral data for Experiment 2. A) Mean ( $\pm$  SEM) almond preference in at  
724 baseline and after withdrawal. No difference in almond preference was found between MB  
725 and MU groups ( $F < 1$ ). B) Mean ( $\pm$  SEM) preference for 4% maltodextrin solution over 4%  
726 sucrose solution at baseline and after withdrawal in MU and MB rats. Maltodextrin  
727 preference was similar in MB and MU groups ( $p > .10$ ).

### 728 **3.3. Discussion**

729 As with sucrose in Experiment 1, in Phase 1 of the present experiment providing access  
730 only every fourth day produced increasing intakes of both the maltodextrin and saccharin  
731 solutions, while in the Unrestricted condition intakes of these solutions showed little change.  
732 In contrast to the results for sucrose found in Phase 2 of Experiment 1, in the present  
733 experiment differences in intake between the Binge group given maltodextrin (MB) and the  
734 group given unrestricted access to maltodextrin (MU) were not maintained in Phase 2.  
735 Furthermore, in Phase 3 returning the two groups to their conditions in Phase 1 failed to re-  
736 instate the previous differences.

737 The concentration of the maltodextrin solution in the present experiment was chosen to  
738 match the energy content of the 4% sucrose solution used in Experiment 1. Consequently,  
739 the failure to find persistent binge-like consumption of maltodextrin suggests that energy  
740 content is not an important contributor to this effect but rather that the sweet taste of sucrose  
741 plays an important role. Due to the unplanned switch in saccharin solutions, however, we  
742 were unable to assess whether the binge effect with a non-caloric sweet solution would  
743 persist in the present experiment. Following the present experiment we carried out a  
744 systematic comparison between sodium saccharin salt hydrate (SSSH) and pure (acid-free)  
745 saccharin (S). This confirmed that 0.4% SSSH is much more acceptable to rats than 0.4% S,  
746 whereas this difference is less apparent at concentrations of 0.1% (Rehn, Onuma, Rooney, &  
747 Boakes, 2018)

748 Regarding the failure in this experiment to find any group differences in the craving and  
749 withdrawal measures, this is discussed in the General Discussion.

750

### 751 **4. Experiment 3: Bingeing on highly hedonic solutions**

752 As for Experiment 3, the main aim of this experiment was to test whether the persistence  
753 effect that can be obtained with 4% sucrose can also be obtained using other solutions. While  
754 Experiment 2 failed to obtain the effect with a 4% maltodextrin solution, it left open the  
755 possibility that the bingeing on 0.4% saccharin sodium salt hydrate (SSSH) solution found in  
756 Phase 1 would persist into Phase 2. Therefore, the present experiment included 0.4% SSSH  
757 as one of the target solutions. The other target solution was a mixture of 4% glucose and  
758 0.4% SSSH. This was selected because such mixtures are known to be exceptionally  
759 palatable to rats (Valenstein, Cox, & Kakolewski, 1967). Although containing no more  
760 energy than 4% sucrose, it has a higher hedonic value, as confirmed in the present  
761 experiment.

762 Experiment 3 employed a 2 x 2 factorial design (see Table 5), in which one factor,  
763 Solution, was whether rats were given saccharin or the glucose-saccharin mixture, and the  
764 other factor was whether rats had access to their solutions on every fourth day (Binge  
765 condition) or Unrestricted access during Phase 1. This design generated four groups:  
766 Saccharin Unrestricted (SU), Saccharin Binge (SB), Glucose-Saccharin Unrestricted (GSU),  
767 Glucose-Saccharin Binge (GSB). It may be noted that, since the glucose + saccharin solution  
768 differed from saccharin alone in both being more palatable and containing more energy, we  
769 did not plan to draw any general conclusions regarding the basis of such bingeing from  
770 potential differences in the size and persistence of a binge effect produced by the two  
771 solutions.

772 The same behavioral measures of ‘withdrawal’ and ‘craving’ used in the previous  
773 experiments were employed in Experiment 3, except that lever-press tests were omitted  
774 because of the large individual variability in response rates found in Experiments 1 and 2.

#### 775 **4.1. Methods**

##### 776 *4.1.1. Subjects*

777 Forty experimentally-naïve male Sprague-Dawley rats from the same source as in the  
778 previous experiments were eight weeks old, with an average weight of 234 g (range 212 –  
779 281 g), at the start of the experiment. Upon arrival, rats were group-housed ( $n = 4/\text{cage}$ ) in a  
780 temperature- and humidity-controlled room on a reverse 12:12 h light cycle (lights off at  
781 1000 h). Rats were individually housed in ventilated cages (Techniplast, Australia) divided  
782 into two compartments so that an animal had visual, auditory and olfactory contact with its  
783 neighbor but no physical contact. Other details are the same as detailed for Experiment 1.

##### 784 *4.1.2. Solutions*

785 As previously, these were prepared in tap water. Saccharin sodium salt hydrate (SSSH;  
786 Sigma S-1002) was exclusively used to prepare both the 0.4% saccharin solution and the  
787 mixture of 0.4% saccharin and 4% glucose (15.4 kJ/g, Myopure Dextrose Monohydrate (D-  
788 glucose) [www.myopure.com.au](http://www.myopure.com.au)). Sucrose solutions were prepared as described for  
789 Experiment 1.

##### 790 *4.1.3. Apparatus*

791 The EPM was at a height of 50 cm above the floor and the video camera was mounted at a  
792 height of 92 cm above the center of the EPM. Other details and apparatus are identical to  
793 those described for Experiment 1.

##### 794 *4.1.4. Procedure*

795 The timeline of Experiment 3 is outlined in Table 5.

796

797

Table 5. Experimental design of Experiment 3.

798

| Group<br>(n = 10)                                        | Access conditions                                                                                                  |                                                                               |                                                              |                                  |                                                                                                |
|----------------------------------------------------------|--------------------------------------------------------------------------------------------------------------------|-------------------------------------------------------------------------------|--------------------------------------------------------------|----------------------------------|------------------------------------------------------------------------------------------------|
|                                                          | Pre-diet<br>Phase (15<br>days)                                                                                     | Phase 1<br>(28 days)                                                          | Phase 2<br>(24 days)                                         | Withdrawal<br>period<br>(7 days) | Testing Phase<br>(3 days)                                                                      |
| <b>Saccharin<br/>Unrestricted<br/>(SU)</b>               |                                                                                                                    | 23.5-h access<br>to 0.4% SSSH<br>solution daily                               | 23.5-h<br>access to<br>0.4% SSSH<br>solution                 |                                  |                                                                                                |
| <b>Saccharin<br/>Binge (SB)</b>                          | Water<br>training,<br>almond<br>preference<br>test, target<br>solution<br>preference<br>test (see text<br>4.1.4.1) | 23.5-h access<br>to 0.4% SSSH<br>every fourth day                             | 0.4% SSSH<br>solution<br>every second<br>day                 |                                  | Almond<br>preference test,<br>target solution<br>preference test,<br>EPM (see text<br>4.1.4.5) |
| <b>Glucose-<br/>Saccharin<br/>Unrestricted<br/>(GSU)</b> |                                                                                                                    | 23.5-h access<br>to 4% glucose +<br>0.4% SSSH<br>solution daily               | 23.5-h<br>access to 4%<br>glucose +<br>0.4% SSSH<br>solution | Chow and<br>water only           |                                                                                                |
| <b>Glucose-<br/>Saccharin<br/>Binge (GSB)</b>            |                                                                                                                    | 23.5-h access<br>to 4% glucose +<br>0.4% SSSH<br>solution every<br>fourth day | every second<br>day                                          |                                  |                                                                                                |

799

800 *4.1.4.1. Pre-diet Phase (Day 1-15)*

801 After acclimatization and handling, daily water access was gradually reduced across four  
802 consecutive days from 4 h, to 2 h, 1 h, and 30 min, in preparation for water training in the  
803 drinking chambers. Rats were given 30-min access to water after each water training session.

804 *Water training (Days 1 – 3).* Rats were transferred from their home cages to the  
805 individual drinking chambers where they were given 30-min access to water in each daily  
806 training session. On Day 1 rats were given a single bottle, whereas on Days 2 and 3 rats were  
807 given two bottles (both containing water) and the bottle positions were swapped after 15 min.

808 This was done to acclimate rats to the choice test procedure. After the Day 1 session rats  
809 were returned to their home cages where half of the rats ( $n = 20$ ) received 4-h access to the  
810 0.4% saccharin solution, while the other half received 4-h access to the 4% glucose + 0.4%  
811 saccharin solution. After the Day 2 session rats received 4-h access to the other solution.  
812 Rats were subsequently returned to *ad lib* water access.

813 *Acceptance tests* (Days 4-5). Each rat was given two acceptance tests, one for the  
814 saccharin solution and the other for the glucose and saccharin mixture. During these tests a  
815 rat received a single bottle of either solution for 30 min in the individual drinking chambers.  
816 Rats were then allocated to two conditions (saccharin only vs. saccharin + glucose,  $n =$   
817 20/condition) matched for body weight and saccharin acceptance, calculated as 30-min  
818 intake. From this point onwards, rats were trained and tested using only their target solutions.

819 *Almond preference training and test* (Days 6-9). The procedure was essentially the same  
820 as that described for the previous experiments. Water bottles were removed from home cages  
821 2 h before testing. Across three consecutive days, each rat underwent one daily 10-min  
822 almond preference session where they received either 1% almond + 4% glucose + 0.4%  
823 saccharin (saccharin + glucose condition) or 1% almond + 0.4% saccharin (saccharin only  
824 condition). These solutions were presented in a single bottle on the first day and presented in  
825 two bottles on the second and third days to acclimate rats to the two-bottle choice procedure.  
826 After the training, each rat received a 10-min almond preference test where they were  
827 presented with 1% almond + base solution in one bottle, and base solution alone in another.  
828 The bottle positions were swapped halfway through the test. For the choice tests the base  
829 solution was 0.1% saccharin for rats in the saccharin only condition and a mixture of 1%  
830 glucose and 0.1% saccharin for rats in the mixed condition.

831 *Target solution preference tests* (Day 11-15). Water bottles were removed from home  
832 cages 2 h before each test. On Day 11 each rat was given a two-bottle choice test between  
833 2% sucrose and their target solution. As all rats showed very high preferences (averaging  
834 83% for saccharin and 93% for the mixture) for their target solution over 2% sucrose, several  
835 two-bottle choice tests were conducted using increasing sucrose concentrations (4%, 6%, 8%,  
836 12%) as the comparison solution until preference for the target solution was between 50-70%.  
837 The final comparison solution for the saccharin rats was 6% sucrose and the comparison  
838 solution for the mixture rats was 12% sucrose. The initial position of the sucrose bottle was  
839 counterbalanced within each group.

840

841

842 *4.1.4.2. Phase 1 (Day 16-43)*

843 Rats in the saccharin condition were allocated to two groups ( $n = 10/\text{group}$ ), Saccharin  
844 Unrestricted (SU) and Saccharin Binge (SB), matched for body weight, almond preference  
845 and sucrose preference. Rats in the mixture condition were similarly allocated to two  
846 matched groups (Glucose + Saccharin Unrestricted [GSU] and Glucose + Saccharin Binge  
847 [GSB]). The two Binge groups (SB, GSB) received 23.5-h access to their target solution  
848 every fourth day, starting at 1000 hrs and taken off at 0930 hrs the next day, while the two  
849 Unrestricted groups (SU, GSU) received 23.5-h access to their target solution daily.

850 *4.1.4.3. Phase 2 (Day 44-67)*

851 All groups were switched to an alternate-day access schedule; rats received access to their  
852 target solutions every second day, starting at 1000 hrs and taken off at 0930 hrs the next day.  
853 On Day 45 (non-target-solution day) all groups were given an almond preference test using  
854 the two-bottle choice test procedure previously described. On Day 47 (non-target-solution  
855 day) all groups were given a target solution preference test relative to 6% sucrose for the  
856 saccharin groups and relative to 12% sucrose for the mixture groups.

857 *4.1.4.4. Withdrawal period (Day 68-74)*

858 No further access to the target solutions was given for the remainder of the experiment.  
859 All remained with unrestricted access to chow and water. For three consecutive days during  
860 this period rats were transported in individual transport cages in squads of ten to the EPM  
861 testing room for 30 min per day to habituate them to the EPM test procedure.

862 *4.1.4.5. Testing Phase (Day 75-78)*

863 Preference tests were conducted using an identical two-bottle choice procedure to that  
864 described in the Pre-diet Phase of this experiment. On Day 75 rats were tested for almond  
865 preference. The next day rats received a sucrose preference test. On Days 77 and 78 each rat  
866 was tested on the elevated plus-maze (EPM) for 5 min following the procedure described in  
867 previous experiments. In this experiment, however, each rat was transferred into individual  
868 transport cages and allowed to habituate to the conditions of the EPM testing room for 10 min  
869 before being placed on the EPM. To avoid potential testing day effects or time of day effects,  
870 the order in which the groups and rats were tested was completely counterbalanced across  
871 both days. The videos were scored by a non-blinded experimenter as described for  
872 Experiment 1.

873 *4.1.5. Data analysis*

874 As in the previous experiments, consumption data were analyzed separately for Phase 1  
875 and Phase 2 using mixed ANOVAs with Solution and Access as between-subject factors, and



876 Day as the within-subject factor. However, unlike in the previous experiments, Test was  
 877 included as a factor for the behavioral data in Experiment 3 because rats were sated during  
 878 both pre- and post-diet tests.

## 879 4.2. Results

### 880 4.2.1. Consumption data

#### 881 4.2.1.1. Chow and bodyweight

882 Chow intakes and bodyweights are shown in Table 6. Chow intake in Phase 1 followed a  
 883 linear trend ( $F(1, 36) = 10.09, p = .003$ ) but this did not differ between groups as main effects  
 884 of Solution or Access or interactions failed to reach significance (all  $ps > .10$ ). Similarly in  
 885 Phase 2, there was a linear trend in chow intake ( $F(1, 36) = 43.49, p < .001$ ) which did not  
 886 differ between Solution or Access conditions (all  $ps > .10$ ). There was a linear trend in body  
 887 weight across the experiment ( $p < .001$ ), indicating that all rats gained weight throughout the  
 888 experiment but this did not differ between groups as no other main effects or interactions  
 889 were found (all  $ps > .10$ ).

890  
 891 Table 6. Mean ( $\pm$  SEM) daily chow intake during Phase 1 and 2 and mean ( $\pm$  SEM) body  
 892 weight at the end of Phase 1 and 2 in SU, SB, GSU, GSB groups in Experiment 3.

| Group ( $n =$<br>10)                                      | Phase 1         |                | Phase 2         |                |
|-----------------------------------------------------------|-----------------|----------------|-----------------|----------------|
|                                                           | Chow (g/d)      | Weight (g)     | Chow (g/d)      | Weight (g)     |
| <b>Saccharin<br/>Unrestricted<br/>(SU)</b>                | 26.8 $\pm$ 0.32 | 521 $\pm$ 14.4 | 26.6 $\pm$ 0.44 | 575 $\pm$ 17.1 |
| <b>Saccharin<br/>Binge (SB)</b>                           | 27.4 $\pm$ 0.32 | 534 $\pm$ 13.5 | 27.8 $\pm$ 0.36 | 600 $\pm$ 17.4 |
| <b>Glucose +<br/>Saccharin<br/>Unrestricted<br/>(GSU)</b> | 25.7 $\pm$ 0.32 | 548 $\pm$ 7.8  | 26.2 $\pm$ 0.18 | 609 $\pm$ 13.2 |
| <b>Glucose +<br/>Saccharin<br/>Binge (GSB)</b>            | 26.2 $\pm$ 0.38 | 523 $\pm$ 15.1 | 25.5 $\pm$ 0.27 | 589 $\pm$ 18.3 |

893

894

895 4.2.1.2. Target solution intakes

896 *Phase 1.* Mean intakes of the target solutions are shown in Figure 5. Initial intakes were  
897 high on the first day of Phase 1, but dropped and stabilized around Day 9. A 2 x 2 x (7)  
898 Solution x Access x Day mixed ANOVA was conducted on intakes during the days when all  
899 rats had access to their target solution. This revealed main effects of Day,  $F(6, 216) = 44.78$ ,  
900  $p < .001$ , Solution,  $F(1, 36) = 28.80$ ,  $p < .001$ , Access,  $F(1, 36) = 20.34$ ,  $p < .001$ , and a Day  
901 by Access interaction effect,  $F(6, 216) = 6.759$ ,  $p < .001$ . As Figure 5 suggests, these main  
902 effects reflect: (1) greater intakes in the GSU and GSB groups on average, than the SU and  
903 SB groups; (2) greater intakes in the rats that received Binge access (GSB and SB groups)  
904 than Unrestricted access (GSU and GSB groups); and (3) a linear,  $F(1, 36) = 55.04$ ,  $p < .001$ ,  
905 and quadratic trend,  $F(1, 36) = 82.89$ ,  $p < .001$  in target solution intake across days. This  
906 analysis also revealed an interaction between Access and linear trend,  $F(1, 36) = 4.32$ ,  $p =$   
907  $.04$ , indicating that apart from the initial drop in intakes across groups, the elevation in  
908 intakes in the GSB and SB groups on average was greater than that seen in the GSU and SU  
909 groups. On the other hand, no interaction between Solution and Access ( $p > .10$ ) was  
910 detected, indicating that no difference was detected between the saccharin and mixed  
911 solutions in the extent to which the one-in-four-days schedule increased intakes above the  
912 daily mean intakes by the unrestricted groups.

913 *Phase 2.* As shown in Figure 5, the GSU and SU groups gradually increased their intakes  
914 across Phase 2 in the GSU and SU groups and yet the GSB and SB groups maintained  
915 consistently elevated intakes. This description was confirmed by a 2 x 2 x (12) mixed  
916 ANOVA applied to common target solution-access days in Phase 2. This revealed a main  
917 effect of Day,  $F(11, 396) = 5.13$ ,  $p < .001$ , Solution,  $F(1, 36) = 31.72$ ,  $p < .001$ , Access,  $F(1,$   
918  $36) = 13.40$ ,  $p = .001$ , and a Day by Access interaction,  $F(11, 396) = 4.88$ ,  $p < .001$ . There  
919 was no interaction between Solution and Access,  $F < 1$ . Together, these effects indicate that  
920 the GSB and SB groups maintained consistently higher intakes than the GSU and SU groups  
921 (i.e. a maintained binge effect), and that despite higher intakes in the GSU and GSB groups  
922 on average relative to the SU and SB groups, the binge effects for the saccharin and the  
923 mixed glucose and saccharin solution were similar. There was a quadratic trend in intakes  
924 across days,  $F(1, 36) = 4.56$ ,  $p = .04$ . Analyses also revealed a Day by Access linear,  $F(1, 36)$   
925  $= 6.91$ ,  $p = .01$ , and quadratic interaction,  $F(1, 36) = 4.19$ ,  $p = .048$ . Figure 5 suggests that  
926 the linear interaction can be accounted by increasing intakes in the GSU and SU groups  
927 across Phase 2 in contrast to steady intakes in the GSB and SB groups.

928

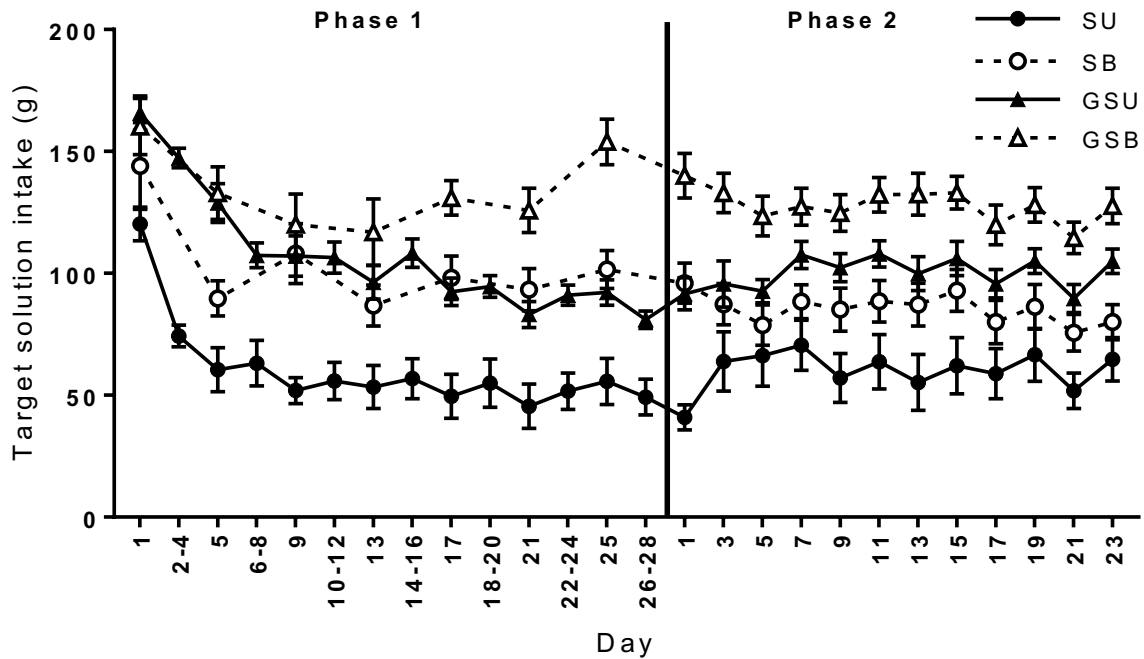

929

930

931 *Figure 5.* Mean ( $\pm$ SEM) 23.5-h intake of target solution in rats given unrestricted (GSU)  
932 or binge access (GSB) to a 4% glucose + 0.4% saccharin solution or unrestricted (SU) or  
933 binge access (SB) to a 0.4% saccharin (SSSH) solution. In Phase 1 GSU and SU rats were  
934 given daily access to their target solutions, whereas GSB and SB rats were given access every  
935 fourth day. In Phase 2 all rats were switched to alternate-day access. SB and GSB groups  
936 drank significantly greater amounts of their target solution relative to their unrestricted  
937 counterparts by the end of Phase 1 ( $p < .001$ ). This intake difference (i.e. binge effect) was  
938 maintained throughout Phase 2 ( $p < .001$ ). NB: Intake data for the GSU group on Day 2-4 is  
939 an average of the Day 1 and Day 5 intakes because their bottles were empty upon  
940 measurement on Day 4 and intakes would have been higher if they were not limited to the  
941 remaining amount of solution in the bottle. Days in this figure indicate the day of each  
942 respective phase and do not correspond to the experimental day.

#### 943 4.2.2. Behavioral data

944 Overall, there were no differences in measures of withdrawal and craving between the  
945 Binge and Unrestricted conditions for either of the target solutions.

946 Almond preferences are shown in Figure 6A. A 2 x 2 x (3) Solution x Access x Test  
947 mixed ANOVA failed to detect any main effects of Solution, Access, Test or interaction  
948 between these factors (all  $ps > .05$ ).

949 As different concentrations of sucrose were used as the comparison solution for the GSU  
950 and GSB groups (12% sucrose) and the SB and SU groups (6% sucrose), 2 x (3) Access x  
951 Test mixed ANOVAs were conducted separately for each solution. For the SU and SB  
952 groups, there was a main effect of Test,  $F(2, 36) = 4.08, p = .03$ , but no Access effect nor  
953 Access by Test interaction ( $F_s < 1$ ), indicating that there were no differences in the decrease  
954 in preference for saccharin over sucrose across tests between the SU and SB groups (Figure  
955 6B). For the GSU and GSB groups, no main effects nor interactions were found ( $p_s > .10$ ),  
956 indicating that preference for the glucose + saccharin solution relative to sucrose remained  
957 consistent across tests (Figure 6C).

958 A 2 x 2 between-subjects ANOVA on percentage of open-arm time based on initial scores  
959 failed to detect any main effects of Solution and Access, or interaction effect,  $F_s < 1$ . The  
960 average percentage of open-arm time was 24.1% in the SU group, 27.3% in the SB group,  
961 29.0% in the GSU group, and 30.4% in the GSB group. These percentages are higher than  
962 those obtained in the previous experiment and suggest that the present rats were not anxious.  
963 Inter-rater reliability analyses were not run because no group differences were found.

964

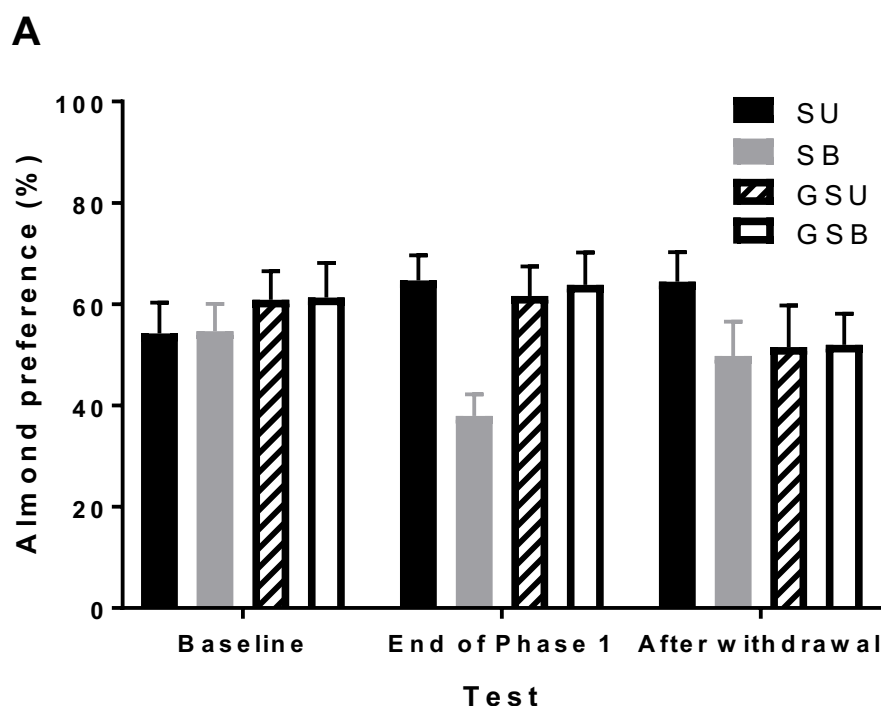

965

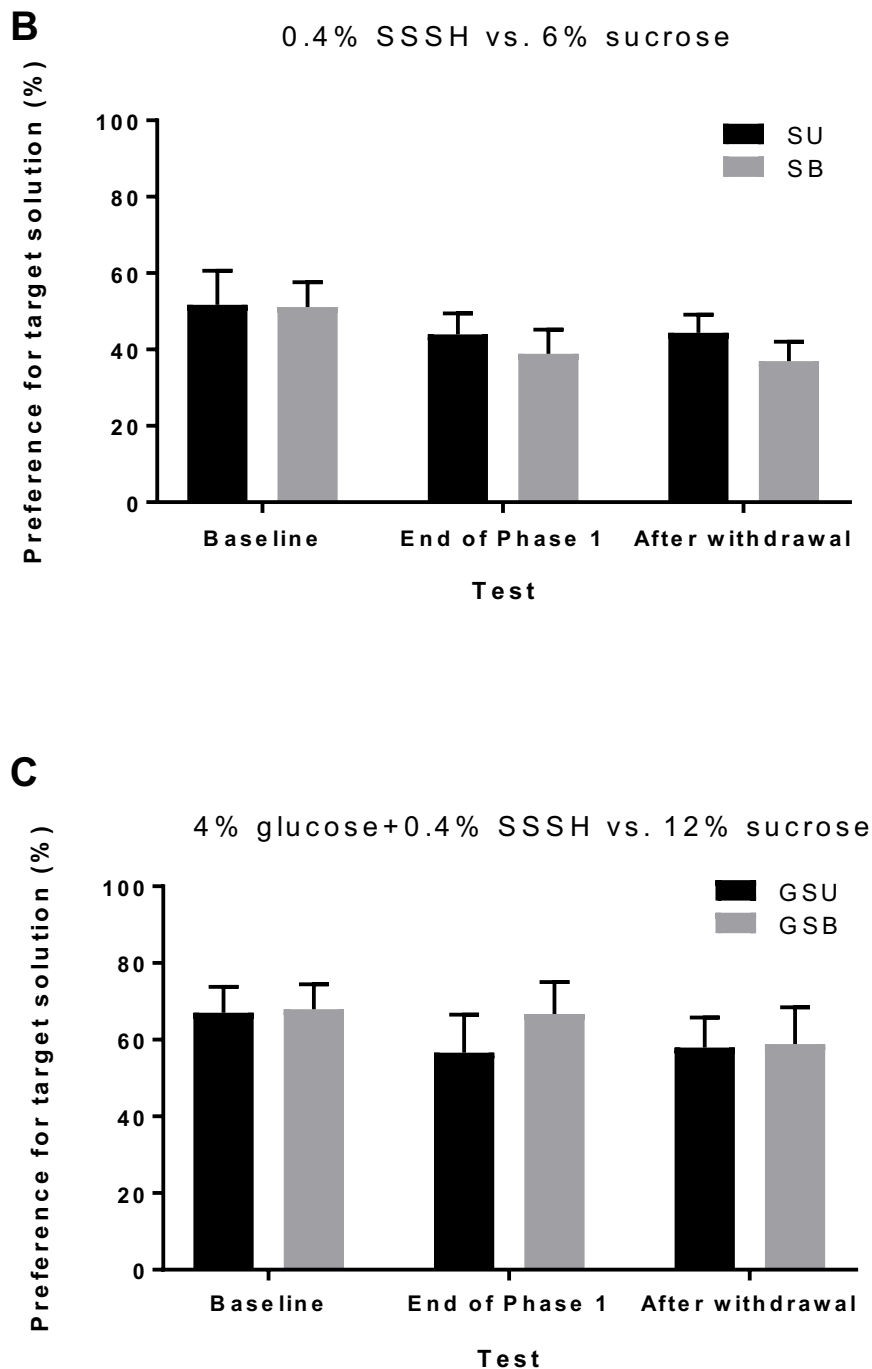

968

969 *Figure 6.* Behavioral data for Experiment 3. A) Mean ( $\pm$  SEM) preference for an almond-  
970 flavored solution (1% almond + base) over a flavorless solution (base only) in SU, SB, GSU,  
971 and GSB groups. No group differences were found ( $p > .05$ ) B) Mean ( $\pm$  SEM) preference  
972 for 0.4% saccharin (target solution for SU and SB groups) over 6% sucrose solution in a two-  
973 bottle choice test conducted at baseline, end of phase 1, and after withdrawal. Preference for  
974 saccharin decreased across tests similarly between the SB and SU groups ( $p = .03$ ). C) Mean

975 ( $\pm$  SEM) preference for 4% glucose + 0.4% saccharin (target solution for GSU and GSB  
976 groups) over 12% sucrose solution in a two-bottle choice test conducted at baseline, end of  
977 phase 1, and after withdrawal. Preferences for the glucose + saccharin solution remained  
978 consistent across tests in the GSU and GSB groups ( $ps > .10$ ).

### 979 **4.3. Discussion**

980 The current experiment demonstrated that the persistent binge effect found in Experiment  
981 1 could also be found when using a sweet, but non-caloric saccharin solution and a highly  
982 hedonic, mixed glucose and saccharin solution. Both groups receiving every-fourth-day  
983 (Binge) access to either saccharin (SB) or glucose and saccharin solution (GSB) escalated  
984 their intakes across Phase 1, such that they drank significantly greater amounts in the same  
985 24-h period than the respective groups receiving daily (Unrestricted) access to the same  
986 solutions. Most importantly, the differences in intake between rats in the Binge and those in  
987 the Unrestricted conditions were maintained across 24 days of Phase 2, despite both groups  
988 being switched to identical alternate-day access conditions. Further, although the absolute  
989 intakes from the groups given the mixed glucose and saccharin solution were greater than  
990 those given saccharin solution alone, the magnitude of the binge effect was similar for the  
991 two solutions.

992 As in the previous experiments the behavioral measures failed to detect any evidence that  
993 the binge treatment produced either craving or withdrawal. Despite finding persistent binge-  
994 like consumption of saccharin or a mixed glucose and saccharin solution in the SB and GSB  
995 groups respectively, almond preference was similar across these groups and their unrestricted  
996 counterparts (SU, GSU). This suggests that bingeing on a solution does not increase liking  
997 for a flavor paired with that solution. Likewise, when compared to an equally attractive  
998 sucrose solution, GSB and SB groups did not prefer their binged target solutions more than  
999 the GSU and SU groups. EPM data also showed similar levels of anxiety-like behavior  
1000 between Binge and Unrestricted rats.

### 1001 **5. General Discussion**

1002 The current study had two main aims. One was to establish whether the persistence of  
1003 binge-like consumption induced by the adapted Eikelboom protocol would generalize to  
1004 similarly attractive solutions. The second was to test whether persistent bingeing would be  
1005 accompanied by addiction-like behaviors. As discussed in more detail below, the first aim  
1006 was achieved but no evidence was obtained to indicate that the 1-in-4-days binge treatment  
1007 produced addiction to any of the solutions used in the three experiments.

1008 Experiment 1 established that 1-in-4-days access to 4% sucrose solution produced an  
1009 escalation in 24-h intake across exposures and that these elevated intakes persisted when  
1010 switched to alternate-day access, even when the duration of Phase 1 at 28 days was shorter  
1011 than the 49 days in Eikelboom and Hewitt (2016) . Experiment 2 extended the adapted  
1012 Eikelboom protocol by replacing sucrose with two target solutions: 4% maltodextrin and  
1013 0.4% saccharin. While 1-in-4-days access to maltodextrin increased intakes, this effect did  
1014 not persist. Unfortunately, Experiment 2 could not assess whether a persistent bingeing  
1015 effect could be produced using saccharin. Consequently, Experiment 3 compared 0.4%  
1016 saccharin solution with a highly palatable mixed 4% glucose and 0.4% saccharin solution.  
1017 Using these solutions, Experiment 3 found the same persistent bingeing effect as that found  
1018 for 4% sucrose in Experiment 1, thus satisfying our first aim. As for our second aim, we  
1019 failed to find ‘withdrawal’ or ‘craving’ in rats engaging in persistent binge-like consumption  
1020 in all three experiments.

1021 Sweetness appears to be a driving factor in persistent binge-like consumption under the  
1022 Eikelboom protocol. Our main findings of persistent binge-like consumption of sucrose,  
1023 saccharin and a mixed glucose-saccharin solution, yet not of maltodextrin, demonstrate the  
1024 generalizability of the adapted Eikelboom protocol to sweet solutions. In Phase 1 of  
1025 Experiment 2, 1-in-4-days access to maltodextrin solution in the Maltodextrin Binge (MB)  
1026 group increased 24-h intakes to levels higher than that of the Maltodextrin Unrestricted (MU)  
1027 group given continuous access. This finding is consistent with existing studies demonstrating  
1028 that intermittency increases intakes (Corwin & Babbs, 2012), and our current findings from  
1029 Experiment 1 and 3. However, when the MB and MU groups were switched to alternate-day  
1030 access in Phase 2 of Experiment 2, the MU group rapidly increased their intakes to match  
1031 those of the MB group. As 4% maltodextrin has a similar caloric value to 4% sucrose used in  
1032 Experiment 1, the collapse of the bingeing effect when maltodextrin was used suggests that  
1033 caloric value is not critical to the persistent bingeing effect. Supporting this idea, the current  
1034 study found persistent bingeing using non-caloric saccharin in Experiment 3.

1035 One explanation that Eikelboom and Hewitt (2016) offer for findings of persistent binge-  
1036 like consumption is that learning about the value of sucrose is different with intermittent  
1037 access. Mice with a history of daily intermittent access to sucrose or saccharin when food-  
1038 deprived were later found to exhibit binge-like consumption even after a systematic  
1039 administration of glucose and chow consumption (Yasoshima & Shimura, 2015). These  
1040 researchers concluded that intermittent access enhances the hedonic value of a solution rather  
1041 than induce any homeostatic or metabolic changes (Yasoshima & Shimura, 2015). In the

1042 current study, some support for intermittent access increasing hedonic value was found in  
1043 Experiment 1 using the target solution preference tests; the Binge group had elevated sucrose  
1044 preferences (relative to maltodextrin) compared to the Unrestricted group at the end of Phase  
1045 1. However, no group differences in sucrose preferences were evident at the end of Phase 2  
1046 despite the persistent binge effect. On the other hand, Experiment 3 failed to find any group  
1047 differences in target solution preference (relative to sucrose) at the end of Phase 1 or Phase 2.  
1048 This inconsistency in finding group differences between experiments even when a persistent  
1049 binge effect was established suggests that the target solution preference tests may have been  
1050 insensitive to hedonic changes. However, no direct measure of the hedonic value of the  
1051 solutions was employed in the present experiments.

1052 The failure to obtain any evidence that the Binge rats became addicted to any of the  
1053 solutions used in these experiments from the two remaining behavioral measures seems  
1054 unlikely to be attributed to the inadequacy of the measures used. In Experiment 1, a  
1055 difference in rate of responding for 4% sucrose was found at the end of Phase 1 between the  
1056 Chow group and the two sucrose groups, albeit in the unexpected direction whereby the  
1057 Chow rats responded at a higher rate than the other two groups. There was no suggestion at  
1058 all of a difference between Binge and Unrestricted groups in lever-press rates at either the  
1059 end of Phase 1 or the end of Phase 2.

1060 A similar argument applies to the almond preference measure. As seen in Figure 1A, in  
1061 Experiment 1 almond preferences were higher in the two sucrose groups than in the Chow  
1062 group at the ends of both Phase 1 and Phase 2 but there was no indication of any difference  
1063 between the Binge and Unrestricted groups on this measure. As for the data obtained from  
1064 the almond preference tests in Experiment 3 (see Figure 6A), of the two groups given  
1065 saccharin the Binge group (SB) displayed lower preferences than the Unrestricted group  
1066 (SU), while there was no sign of any difference between the two groups given the glucose  
1067 and saccharin mix (GSU and GSB).

1068 The use of the elevated plus-maze (EPM) to measure possible withdrawal was based on  
1069 experiments using the Hoebel protocol whereby a higher level of anxiety, as measured on the  
1070 EPM, was found in some experiments following a period in which intermittent access to a  
1071 sugar solution was no longer given (Avena et al., 2008). However, it must be noted that in  
1072 the Hoebel protocol withdrawal-like behaviour was found following a 24-36 h food-  
1073 deprivation period and/or a naloxone injection (Colantuoni et al., 2002). These conditions  
1074 were not replicated in the current study. In Experiment 1 the groups did not show any signs of  
1075 differing levels of anxiety as measured on the EPM. However, the mean percent of time



1076 spent on the open arms was low, suggesting that a floor effect - whereby all rats were  
1077 displaying a high level of anxiety – might have obscured possible group differences. This  
1078 argument cannot be applied to the EPM results from Experiment 3, where the percentages of  
1079 time spent on the open arms was higher for all four groups than in Experiment 1 and at a  
1080 level suggesting a low level of anxiety overall. Thus, as with the craving measures, it seems  
1081 that the failure to detect a withdrawal effect in the Binge groups was unlikely to be because  
1082 of insensitivity of the measure employed. Rather, previous reports of addiction-like  
1083 behaviours accompanying bingeing may not exist under the more controlled and circadian-  
1084 independent conditions of the current study protocol.

1085 The prediction that addiction-related effects would be produced by the present procedures  
1086 was partly based on the evidence obtained from what we have referred to as the Hoebel  
1087 protocol, whereby rats are given 12-h access each day to a sugar solution (Avena et al.,  
1088 2008). It may be noted that a recent substantial study that used 10% sucrose in this protocol  
1089 found that the procedure reduced, rather than increased, *wanting* for the sucrose solution.  
1090 The measure used in these experiments was a conditioned place preference test, which is  
1091 analogous to the almond preference measure used here (Smail-Crevier, et al., 2018). It is also  
1092 worth mentioning that in comparison to multiple studies focusing on a single outcome  
1093 measure using the Hoebel protocol (e.g. Avena, Bocarsly, Rada, Kim, & Hoebel, 2008;  
1094 Avena & Hoebel, 2003; Avena et al., 2005; Colantuoni et al., 2002), the current study used  
1095 multiple outcome measures of addiction-like behaviours in the same experiment to fully  
1096 assess whether access-induced bingeing behaviour can be appropriately considered  
1097 ‘addictive’.

1098 In conclusion, these experiments indicate that the hedonic value of a solution is more  
1099 important than its caloric value in determining whether 1-in-4-days intermittent access to a  
1100 solution will produce persistent bingeing. However, they suggest that such persistence is not  
1101 produced by some kind of addiction to the solution, since our assessments of withdrawal and  
1102 compulsive-like behaviour toward the putative addictive substance in each case yielded null  
1103 results.

1104

### 1105 **Acknowledgements**

1106 This study was partly supported by Australian Research Council Discovery grant  
1107 DP170103927 and partly by the School of Psychology at the University of Sydney.  
1108 Experiments 1 and 2 were reported by SR in an Honours thesis in Psychology (2017). We

1109 are grateful for the technical help provided by Nenad Petkovski and for advice on procedures  
1110 plus comments on the manuscript by Dr. Michael Kendig.

## References

- 1111
- 1112 Ahmed, S., & Koob, G. (1998). Transition from moderate to excessive drug intake: change in  
1113 hedonic set point. *Science*, 282(5387), 298-300.
- 1114 Association, A. P. (2013). *Diagnostic and Statistical Manual of Mental Disorders (DSM-5)*.  
1115 Arlington, VA: American Psychiatric Publishing.
- 1116 Avena, N. M., Bocarsly, M. E., Rada, P., Kim, A., & Hoebel, B. G. (2008). After daily  
1117 bingeing on a sucrose solution, food deprivation induces anxiety and accumbens  
1118 dopamine/acetylcholine imbalance. *Physiology & Behavior*, 94(3), 309-315.  
1119 doi:10.1016/j.physbeh.2008.01.008
- 1120 Avena, N. M., & Hoebel, B. G. (2003). A diet promoting sugar dependency causes behavioral  
1121 cross-sensitization to a low dose of amphetamine. *Neuroscience*, 122(1), 17-20.
- 1122 Avena, N. M., Long, K. A., & Hoebel, B. G. (2005). Sugar-dependent rats show enhanced  
1123 responding for sugar after abstinence: Evidence of a sugar deprivation effect.  
1124 *Physiology & Behavior*, 84(3), 359-362. doi:10.1016/j.physbeh.2004.12.016
- 1125 Avena, N. M., Rada, P., & Hoebel, B. G. (2008). Evidence for sugar addiction: behavioral  
1126 and neurochemical effects of intermittent, excessive sugar intake. *Neuroscience &*  
1127 *Biobehavioral Reviews*, 32(1), 20-39.
- 1128 Bolles, R. C., & Stokes, L. W. (1965). Rat's anticipation of diurnal and a-diurnal feeding.  
1129 *Journal of Comparative and Physiological Psychology*, 60(2), 290.
- 1130 Boulos, Z., Rosenwasser, A. M., & Terman, M. (1980). Feeding schedules and the circadian  
1131 organization of behavior in the rat. *Behavioural Brain Research*, 1(1), 39-65.
- 1132 Colantuoni, C., Rada, P., McCarthy, J., Patten, C., Avena, N. M., Chadeayne, A., & Hoebel,  
1133 B. (2002). Evidence That Intermittent, Excessive Sugar Intake Causes Endogenous  
1134 Opioid Dependence. *Obesity Research*, 10(6), 478-488. doi:10.1038/oby.2002.66
- 1135 Colles, S. L., Dixon, J. B., & O'Brien, P. E. (2008). Loss of control is central to psychological  
1136 disturbance associated with binge eating disorder. *Obesity*, 16(3), 608-614.
- 1137 Corwin, R. L. W., & Babbs, R. K. (2012). Rodent Models of Binge Eating: Are They Models  
1138 of Addiction? *ILAR Journal*, 53(1), 23-34. doi:10.1093/ilar.53.1.23
- 1139 Corwin, R. L. W., & Buda-Levin, A. (2004). Behavioral models of binge-type eating.  
1140 *Physiology & Behavior*, 82(1), 123-130.
- 1141 Corwin, R. L. W., & Wojnicki, F. H. E. (2006). Binge eating in rats with limited access to  
1142 vegetable shortening. *Current protocols in neuroscience*, 36(1), 9.23 B. 21-29.23 B.  
1143 11.

- 1144 Eikelboom, R., & Hewitt, R. (2016). Intermittent access to a sucrose solution for rats causes  
1145 long-term increases in consumption. *Physiology & Behavior*, *165*, 77-85.  
1146 doi:10.1016/j.physbeh.2016.07.002
- 1147 Francis, H. M., & Stevenson, R. J. (2011). Higher reported saturated fat and refined sugar  
1148 intake is associated with reduced hippocampal-dependent memory and sensitivity to  
1149 interoceptive signals. *Behavioral neuroscience*, *125*(6), 943.
- 1150 Fudim, O. K. (1978). Sensory preconditioning of flavors with a formalin-produced sodium  
1151 need. *Journal of Experimental Psychology: Animal Behavior Processes*, *4*(3), 276.
- 1152 Kales, E. F. (1990). Macronutrient analysis of binge eating in bulimia. *Physiology &*  
1153 *Behavior*, *48*(6), 837-840.
- 1154 Kanoski, S. E., & Davidson, T. L. (2011). Western diet consumption and cognitive  
1155 impairment: links to hippocampal dysfunction and obesity. *Physiology & Behavior*,  
1156 *103*(1), 59-68.
- 1157 Kendig, M. D., Lin, C. S., Beilharz, J. E., Rooney, K. B., & Boakes, R. A. (2014).  
1158 Maltodextrin can produce similar metabolic and cognitive effects to those of sucrose  
1159 in the rat. *Appetite*, *77*, 1-12.
- 1160 Landry, G. J., Yamakawa, G. R., Webb, I. C., Mear, R. J., & Mistlberger, R. E. (2007). The  
1161 dorsomedial hypothalamic nucleus is not necessary for the expression of circadian  
1162 food-anticipatory activity in rats. *Journal of Biological Rhythms*, *22*(6), 467-478.
- 1163 Markou, A., Weiss, F., Gold, L. H., Caine, S. B., Schulteis, G., & Koob, G. F. (1993).  
1164 Animal models of drug craving. *Psychopharmacology*, *112*(2), 163-182.  
1165 doi:10.1007/bf02244907
- 1166 Mistlberger, R. E. (1993). Effects of scheduled food and water access on circadian rhythms of  
1167 hamsters in constant light, dark, and light: dark. *Physiology & Behavior*, *53*(3), 509-  
1168 516.
- 1169 Nissenbaum, J. W., & Sclafani, A. (1987). Qualitative differences in polysaccharide and  
1170 sugar tastes in the rat: a two-carbohydrate taste model. *Neuroscience & Biobehavioral*  
1171 *Reviews*, *11*(2), 187-196.
- 1172 Nyaradi, A., Foster, J. K., Hickling, S., Li, J., Ambrosini, G. L., Jacques, A., & Oddy, W. H.  
1173 (2014). Prospective associations between dietary patterns and cognitive performance  
1174 during adolescence. *Journal of Child Psychology and Psychiatry*, *55*(9), 1017-1024.
- 1175 Pecoraro, N., Gomez, F., Laugero, K., & Dallman, M. F. (2002). Brief access to sucrose  
1176 engages food-entrainable rhythms in food-deprived rats. *Behavioral neuroscience*,  
1177 *116*(5), 757.

- 1178 Petry, N. M., & Heyman, G. M. (1995). Behavioural economics of concurrent ethanol-  
1179 sucrose and sucrose reinforcement in the rat: Effects of altering variable-ratio  
1180 requirements. *Journal of the Experimental Analysis of Behavior*, 64(3), 331-359.
- 1181 Rehn, S., Onuma, T., Rooney, K. B., & Boakes, R. A. (2018). Sodium saccharin can be more  
1182 acceptable to rats than pure saccharin. *Behavioural processes*, 157, 188-191.
- 1183 Schulteis, G., Yackey, M., Risbrough, V., & Koob, G. F. (1998). Anxiogenic-like effects of  
1184 spontaneous and naloxone-precipitated opiate withdrawal in the elevated plus-maze.  
1185 *Pharmacology Biochemistry and Behavior*, 60(3), 727-731.
- 1186 Sclafani, A. (1987). Carbohydrate taste, appetite, and obesity: an overview. *Neuroscience &*  
1187 *Biobehavioral Reviews*, 11(2), 131-153.
- 1188 Sclafani, A., Einberg, L. T., & Nissenbaum, J. W. (1987). Influence of saccharin on Polydose,  
1189 sucrose, and glucose intake and preference in rats. *Neuroscience & Biobehavioral*  
1190 *Reviews*, 11(2), 223-229.
- 1191 Valenstein, E. S., Cox, V. C., & Kakolewski, J. W. (1967). Polydipsia elicited by the  
1192 synergistic action of a saccharin and glucose solution. *Science*, 157(3788), 552-554.
- 1193 Walf, A. A., & Frye, C. A. (2007). The use of the elevated plus maze as an anxiety-  
1194 related behavior in rodents. *Nature Protocols*, 2(2), 322.
- 1195 Yanovski, S. Z., Leet, M., Yanovski, J. A., Flood, M., Gold, P. W., Kissileff, H. R., & Walsh,  
1196 B. T. (1992). Food selection and intake of obese women with binge-eating disorder.  
1197 *The American Journal of Clinical Nutrition*, 56(6), 975-980.
- 1198 Yasoshima, Y., & Shimura, T. (2015). A mouse model for binge-like sucrose  
1199 overconsumption: contribution of enhanced motivation for sweetener consumption.  
1200 *Physiology & Behavior*, 138, 154-164.
- 1201 Young, P. T., & Trafton, C. L. (1964). Activity contour maps as related to preferences in four  
1202 gustatory stimulus areas of the rat. *Journal of Comparative and Physiological*  
1203 *Psychology*, 58(1), 68.
- 1204
